# Supplementary material for: Twenty-year follow-up of promising clinical studies reported in highly circulated newspapers: a meta-epidemiological study
Source: HighWire-hosted journal article supplement (doi:10.1136/bmjhci-2023-100768), 2023-06-01
Supplement: bmjhci-2023-100768supp001_data_supplement.pdf [file bmjhci-2023-100768supp001_data_supplement.pdf]

eTable 1. Journal names and impact factors of the year 2000

| IF ranking | General and Internal Medicine Journals                                        | IF (Year 2000) | Public, Environmental and Occupational Health Journals                   | IF (Year 2000) |
|------------|-------------------------------------------------------------------------------|----------------|--------------------------------------------------------------------------|----------------|
| 1          | The New England journal of medicine                                           | 29.5           | Annual review of public health                                           | 4.5            |
| 2          | JAMA                                                                          | 15.4           | Cancer epidemiology, biomarkers & prevention                             | 4.4            |
| 3          | Lancet                                                                        | 10.2           | American journal of epidemiology                                         | 3.9            |
| 4          | Annual review of medicine                                                     | 9.9            | Epidemiology                                                             | 3.6            |
| 5          | Annals of internal medicine                                                   | 9.8            | American journal of public health                                        | 3.3            |
| 6          | Archives of internal medicine                                                 | 6.1            | Environmental health perspectives                                        | 3.0            |
| 7          | The American journal of medicine                                              | 6.0            | Drug safety                                                              | 2.8            |
| 8          | BMJ                                                                           | 5.3            | Medical care                                                             | 2.5            |
| 9          | Medicine                                                                      | 4.6            | Cancer causes & control                                                  | 2.5            |
| 10         | Amyloid: the international journal of experimental and clinical investigation | 3.0            | Journal of toxicology and environmental health. Part B, Critical reviews | 2.4            |
| 11         | Proceedings of the Association of American Physicians                         | 2.9            | Occupational and environmental medicine                                  | 2.3            |
| 12         | The Journal of family practice                                                | 2.9            | Epidemiologic reviews                                                    | 2.3            |
| 13         | Annals of medicine                                                            | 2.8            | American journal of preventive medicine                                  | 2.2            |
| 14         | Journal of general internal medicine                                          | 2.4            | Quality of life research                                                 | 2.2            |
| 15         | Canadian Medical Association journal                                          | 2.4            | Toxicology and industrial health                                         | 2.2            |
| 16         | Journal of internal medicine                                                  | 2.3            | Infection control and hospital epidemiology                              | 2.1            |
| 17         | Archives of family medicine                                                   | 2.3            | Journal of clinical epidemiology                                         | 2.1            |
| 18         | Journal of investigative medicine                                             | 2.3            | Palliative medicine                                                      | 2.0            |
| 19         | QJM: monthly journal of the Association of Physicians                         | 2.3            | Journal of medical screening                                             | 2.0            |
| 20         | Mayo Clinic proceedings                                                       | 2.2            | Bulletin of the World Health Organization                                | 1.9            |
