# Supplementary material for: Twenty-year follow-up of promising clinical studies reported in highly circulated newspapers: a meta-epidemiological study
Source: HighWire-hosted journal article supplement (doi:10.1136/bmjhci-2023-100768), 2023-06-01
Supplement: bmjhci-2023-100768supp002_data_supplement.pdf [file bmjhci-2023-100768supp002_data_supplement.pdf]

eTable 2. PubMed search formulas of subsequent studies

| No. | Original study                                                                                                                                                                                             | Subsequent study                                                                                                                                                            |                                                                                                                                                                                                                                              |                                                                                                                                                                                                                                     |
|-----|------------------------------------------------------------------------------------------------------------------------------------------------------------------------------------------------------------|-----------------------------------------------------------------------------------------------------------------------------------------------------------------------------|----------------------------------------------------------------------------------------------------------------------------------------------------------------------------------------------------------------------------------------------|-------------------------------------------------------------------------------------------------------------------------------------------------------------------------------------------------------------------------------------|
|     | Title                                                                                                                                                                                                      | Search formula                                                                                                                                                              | Search formula + (RCT filter)                                                                                                                                                                                                                | Search formula + (SR or MA filter)                                                                                                                                                                                                  |
| 1   | A comparison of etanercept and methotrexate in patients with early rheumatoid arthritis.<br><i>N Engl J Med. 2000 Nov 30;343(22):1586-93.</i>                                                              | ("Arthritis, Rheumatoid"[Mesh]) AND Etanercept[Mesh] AND "Methotrexate"[Mesh]                                                                                               | ("Arthritis, Rheumatoid"[Mesh]) AND Etanercept[Mesh] AND "Methotrexate"[Mesh] AND (clinicaltrial[Filter] OR randomizedcontrolledtrial[Filter])                                                                                               | ("Arthritis, Rheumatoid"[Mesh]) AND Etanercept[Mesh] AND "Methotrexate"[Mesh] AND (meta-analysis[Filter] OR systematicreview[Filter])                                                                                               |
| 2   | A comparison of glyburide and insulin in women with gestational diabetes mellitus.<br><i>N Engl J Med. 2000 Oct 19;343(16):1134-8.</i>                                                                     | ("Diabetes, Gestational"[Mesh]) AND "Glyburide"[Mesh] AND "Insulin"[Mesh]                                                                                                   | ("Diabetes, Gestational"[Mesh]) AND "Glyburide"[Mesh] AND "Insulin"[Mesh] AND (clinicaltrial[Filter] OR randomizedcontrolledtrial[Filter])                                                                                                   | ("Diabetes, Gestational"[Mesh]) AND "Glyburide"[Mesh] AND "Insulin"[Mesh] AND (meta-analysis[Filter] OR systematicreview[Filter])                                                                                                   |
| 3   | A comparison of inhaled fluticasone and oral prednisone for children with severe acute asthma.<br><i>N Engl J Med. 2000 Sep 7;343(10):689-94.</i>                                                          | ("Asthma"[MeSH] AND "Child"[MeSH]) AND "Adrenal Cortex Hormones"[Mesh]                                                                                                      | ("Asthma"[MeSH] AND "Child"[MeSH]) AND "Adrenal Cortex Hormones"[Mesh] AND (clinicaltrial[Filter] OR randomizedcontrolledtrial[Filter])                                                                                                      | ("Asthma"[MeSH] AND "Child"[MeSH]) AND "Adrenal Cortex Hormones"[Mesh] AND (meta-analysis[Filter] OR systematicreview[Filter])                                                                                                      |
| 4   | A comparison of levomethadyl acetate, buprenorphine, and methadone for opioid dependence.<br><i>N Engl J Med. 2000 Nov 2;343(18):1290-7.</i>                                                               | "Substance-Related Disorders"[Mesh] AND ("Methadyl Acetate"[Mesh] OR "Buprenorphine"[Mesh] OR "Methadone"[Mesh])                                                            | "Substance-Related Disorders"[Mesh] AND ("Methadyl Acetate"[Mesh] OR "Buprenorphine"[Mesh] OR "Methadone"[Mesh]) AND (clinicaltrial[Filter] OR randomizedcontrolledtrial[Filter])                                                            | "Substance-Related Disorders"[Mesh] AND ("Methadyl Acetate"[Mesh] OR "Buprenorphine"[Mesh] OR "Methadone"[Mesh]) AND (meta-analysis[Filter] OR systematicreview[Filter])                                                            |
| 5   | A comparison of nefazodone, the cognitive behavioral-analysis system of psychotherapy, and their combination for the treatment of chronic depression.<br><i>N Engl J Med. 2000 May 18;342(20):1462-70.</i> | "Depressive Disorder"[Mesh] AND ("nefazodone" [Supplementary Concept] OR "Antidepressive Agents"[Mesh] AND ("Psychotherapy"[Mesh] OR "Cognitive Behavioral Therapy"[Mesh])) | "Depressive Disorder"[Mesh] AND ("nefazodone" [Supplementary Concept] OR "Antidepressive Agents"[Mesh] AND ("Psychotherapy"[Mesh] OR "Cognitive Behavioral Therapy"[Mesh])) AND (clinicaltrial[Filter] OR randomizedcontrolledtrial[Filter]) | "Depressive Disorder"[Mesh] AND ("nefazodone" [Supplementary Concept] OR "Antidepressive Agents"[Mesh] AND ("Psychotherapy"[Mesh] OR "Cognitive Behavioral Therapy"[Mesh])) AND (meta-analysis[Filter] OR systematicreview[Filter]) |
| 6   | A controlled trial of sustained-release bupropion, a nicotine patch, or both for smoking cessation.<br><i>N Engl J Med. 1999 Mar 4;340(9):685-91.</i>                                                      | "Smoking Cessation"[Mesh] AND ("Antidepressive Agents"[Mesh] OR "Tobacco Use Cessation Devices"[Mesh])                                                                      | "Smoking Cessation"[Mesh] AND ("Antidepressive Agents"[Mesh] OR "Tobacco Use Cessation Devices"[Mesh]) AND (clinicaltrial[Filter] OR randomizedcontrolledtrial[Filter])                                                                      | "Smoking Cessation"[Mesh] AND ("Antidepressive Agents"[Mesh] OR "Tobacco Use Cessation Devices"[Mesh]) AND (meta-analysis[Filter] OR systematicreview[Filter])                                                                      |
| 7   | A five-year study of the incidence of dyskinesia in                                                                                                                                                        | "Parkinson Disease"[Mesh] AND ("Antiparkinson                                                                                                                               | "Parkinson Disease"[Mesh] AND ("Antiparkinson                                                                                                                                                                                                | "Parkinson Disease"[Mesh] AND ("Antiparkinson Agents"[Mesh])                                                                                                                                                                        |

|    |                                                                                                                                                                                                            |                                                                                                              |                                                                                                                                                                          |                                                                                                                                                         |
|----|------------------------------------------------------------------------------------------------------------------------------------------------------------------------------------------------------------|--------------------------------------------------------------------------------------------------------------|--------------------------------------------------------------------------------------------------------------------------------------------------------------------------|---------------------------------------------------------------------------------------------------------------------------------------------------------|
|    | patients with early Parkinson's disease who were treated with ropinirole or levodopa.<br><i>N Engl J Med. 2000 May 18;342(20):1484-91.</i>                                                                 | Agents"[Mesh] OR "ropinirole" [Supplementary Concept] OR "Levodopa"[Mesh] OR "Dopamine Agonists"[Mesh])      | Agents"[Mesh] OR "ropinirole" [Supplementary Concept] OR "Levodopa"[Mesh] OR "Dopamine Agonists"[Mesh]) AND (clinicaltrial[Filter] OR randomizedcontrolledtrial[Filter]) | OR "ropinirole" [Supplementary Concept] OR "Levodopa"[Mesh] OR "Dopamine Agonists"[Mesh]) AND (meta-analysis[Filter] OR systematicreview[Filter])       |
| 8  | A placebo-controlled, double-blind, randomized trial of an extract of Ginkgo biloba for dementia. North American EGb Study Group.<br><i>JAMA. 1997 Oct 22-29;278(16):1327-32.</i>                          | "Dementia"[Mesh] AND ("Ginkgo biloba"[Mesh] OR "Ginkgo biloba extract" [Supplementary Concept])              | "Dementia"[Mesh] AND ("Ginkgo biloba"[Mesh] OR "Ginkgo biloba extract" [Supplementary Concept]) AND (clinicaltrial[Filter] OR randomizedcontrolledtrial[Filter])         | "Dementia"[Mesh] AND ("Ginkgo biloba"[Mesh] OR "Ginkgo biloba extract" [Supplementary Concept]) AND (meta-analysis[Filter] OR systematicreview[Filter]) |
| 9  | A preliminary study of growth hormone therapy for Crohn's disease.<br><i>N Engl J Med. 2000 Jun 1;342(22):1633-7.</i>                                                                                      | "Crohn Disease"[Mesh] AND "Growth Hormone"[Mesh]                                                             | "Crohn Disease"[Mesh] AND "Growth Hormone"[Mesh] AND (clinicaltrial[Filter] OR randomizedcontrolledtrial[Filter])                                                        | "Crohn Disease"[Mesh] AND "Growth Hormone"[Mesh] AND (meta-analysis[Filter] OR systematicreview[Filter])                                                |
| 10 | A prolonged outbreak of Pseudomonas aeruginosa in a neonatal intensive care unit: did staff fingernails play a role in disease transmission?<br><i>Infect Control Hosp Epidemiol. 2000 Feb;21(2):80-5.</i> | ("Nails"[Mesh]) AND "Intensive Care Units, Neonatal"[Mesh]                                                   | ("Nails"[Mesh]) AND "Intensive Care Units, Neonatal"[Mesh] AND (clinicaltrial[Filter] OR randomizedcontrolledtrial[Filter])                                              | ("Nails"[Mesh]) AND "Intensive Care Units, Neonatal"[Mesh] AND (meta-analysis[Filter] OR systematicreview[Filter])                                      |
| 11 | A prospective study of coffee consumption and the risk of symptomatic gallstone disease in men.<br><i>JAMA. 1999 Jun 9;281(22):2106-12.</i>                                                                | "Coffee"[Mesh] AND ("Cholelithiasis"[Mesh] OR "Gallstones"[Mesh])                                            | "Coffee"[Mesh] AND ("Cholelithiasis"[Mesh] OR "Gallstones"[Mesh]) AND (clinicaltrial[Filter] OR randomizedcontrolledtrial[Filter])                                       | "Coffee"[Mesh] AND ("Cholelithiasis"[Mesh] OR "Gallstones"[Mesh]) AND (meta-analysis[Filter] OR systematicreview[Filter])                               |
| 12 | A prospective study of diet quality and mortality in women.<br><i>JAMA. 2000 Apr 26;283(16):2109-15.</i>                                                                                                   | "Diet"[Mesh] AND "Mortality"[Mesh]                                                                           | "Diet"[Mesh] AND "Mortality"[Mesh] AND (clinicaltrial[Filter] OR randomizedcontrolledtrial[Filter])                                                                      | "Diet"[Mesh] AND "Mortality"[Mesh] AND (meta-analysis[Filter] OR systematicreview[Filter])                                                              |
| 13 | A randomized controlled trial of auricular acupuncture for cocaine dependence.<br><i>Arch Intern Med. 2000 Aug 14-28;160(15):2305-12.</i>                                                                  | "Cocaine-Related Disorders"[Mesh] AND "Acupuncture Therapy"[Mesh]                                            | "Cocaine-Related Disorders"[Mesh] AND "Acupuncture Therapy"[Mesh] AND (clinicaltrial[Filter] OR randomizedcontrolledtrial[Filter])                                       | "Cocaine-Related Disorders"[Mesh] AND "Acupuncture Therapy"[Mesh] AND (meta-analysis[Filter] OR systematicreview[Filter])                               |
| 14 | A randomized, controlled trial of the effects of remote, intercessory prayer on outcomes in patients admitted                                                                                              | ("Religion"[Mesh] OR "Spiritual Therapies"[Mesh] OR "Helping Behavior"[Mesh] OR "Behavioral Medicine"[Mesh]) | ("Religion"[Mesh] OR "Spiritual Therapies"[Mesh] OR "Helping Behavior"[Mesh] OR "Behavioral Medicine"[Mesh] OR pray*)                                                    | ("Religion"[Mesh] OR "Spiritual Therapies"[Mesh] OR "Helping Behavior"[Mesh] OR "Behavioral Medicine"[Mesh] OR pray*)                                   |

|    |                                                                                                                                                                                                                                   |                                                                                                                                                                                         |                                                                                                                                                                                                                       |                                                                                                                                                                                                                       |
|----|-----------------------------------------------------------------------------------------------------------------------------------------------------------------------------------------------------------------------------------|-----------------------------------------------------------------------------------------------------------------------------------------------------------------------------------------|-----------------------------------------------------------------------------------------------------------------------------------------------------------------------------------------------------------------------|-----------------------------------------------------------------------------------------------------------------------------------------------------------------------------------------------------------------------|
|    | to the coronary care unit.<br><i>Arch Intern Med. 1999 Oct 25;159(19):2273-8.</i>                                                                                                                                                 | OR pray*)                                                                                                                                                                               | AND (clinicaltrial[Filter] OR randomizedcontrolledtrial[Filter])                                                                                                                                                      | AND (meta-analysis[Filter] OR systematicreview[Filter])                                                                                                                                                               |
| 15 | All-cause mortality associated with physical activity during leisure time, work, sports, and cycling to work.<br><i>Arch Intern Med. 2000 Jun 12;160(11):1621-8.</i>                                                              | ("Leisure Activities"[Mesh] OR "Exercise"[Mesh] OR "Sedentary Behavior"[Mesh]) AND "Mortality"[Mesh]                                                                                    | ("Leisure Activities"[Mesh] OR "Exercise"[Mesh] OR "Sedentary Behavior"[Mesh]) AND "Mortality"[Mesh] AND (clinicaltrial[Filter] OR randomizedcontrolledtrial[Filter])                                                 | ("Leisure Activities"[Mesh] OR "Exercise"[Mesh] OR "Sedentary Behavior"[Mesh]) AND "Mortality"[Mesh] AND (meta-analysis[Filter] OR systematicreview[Filter])                                                          |
| 16 | Anti-digoxin Fab fragments in cardiotoxicity induced by ingestion of yellow oleander: a randomised controlled trial.<br><i>Lancet. 2000 Mar 18;355(9208):967-72.</i>                                                              | ("Thevetia"[Mesh] OR "yellow oleander"[All Fields])                                                                                                                                     | ("Thevetia"[Mesh] OR "yellow oleander"[All Fields]) AND (clinicaltrial[Filter] OR randomizedcontrolledtrial[Filter])                                                                                                  | ("Thevetia"[Mesh] OR "yellow oleander"[All Fields]) AND (meta-analysis[Filter] OR systematicreview[Filter])                                                                                                           |
| 17 | Antitumor activity of thalidomide in refractory multiple myeloma.<br><i>N Engl J Med. 1999 Nov 18;341(21):1565-71.</i>                                                                                                            | "Multiple Myeloma"[Mesh] AND "Thalidomide"[Mesh]                                                                                                                                        | "Multiple Myeloma"[Mesh] AND "Thalidomide"[Mesh] AND (clinicaltrial[Filter] OR randomizedcontrolledtrial[Filter])                                                                                                     | "Multiple Myeloma"[Mesh] AND "Thalidomide"[Mesh] AND (meta-analysis[Filter] OR systematicreview[Filter])                                                                                                              |
| 18 | Association of the California Tobacco Control Program with declines in cigarette consumption and mortality from heart disease.<br><i>N Engl J Med. 2000 Dec 14;343(24):1772-7.</i>                                                | "Smoking"[Mesh] AND "Heart Diseases"[Mesh]                                                                                                                                              | "Smoking"[Mesh] AND "Heart Diseases"[Mesh] AND (clinicaltrial[Filter] OR randomizedcontrolledtrial[Filter])                                                                                                           | "Smoking"[Mesh] AND "Heart Diseases"[Mesh] AND (meta-analysis[Filter] OR systematicreview[Filter])                                                                                                                    |
| 19 | Attendance at cultural events, reading books or periodicals, and making music or singing in a choir as determinants for survival: Swedish interview survey of living conditions.<br><i>BMJ. 1996 Dec 21-28;313(7072):1577-80.</i> | "Human Activities"[Mesh] AND "Mortality"[Mesh]                                                                                                                                          | "Human Activities"[Mesh] AND "Mortality"[Mesh] AND (clinicaltrial[Filter] OR randomizedcontrolledtrial[Filter])                                                                                                       | "Human Activities"[Mesh] AND "Mortality"[Mesh] AND (meta-analysis[Filter] OR systematicreview[Filter])                                                                                                                |
| 20 | Cardiopulmonary resuscitation by chest compression alone or with mouth-to-mouth ventilation.<br><i>N Engl J Med. 2000 May 25;342(21):1546-53.</i>                                                                                 | ("Cardiopulmonary Resuscitation"[Mesh] OR "Out-of-Hospital Cardiac Arrest"[Mesh]) AND ("Mouth-to-Mouth Ventilation"[All Fields] OR "Chest Wall Oscillation"[Mesh] OR Chest-compression) | ("Cardiopulmonary Resuscitation"[Mesh] OR "Out-of-Hospital Cardiac Arrest"[Mesh]) AND ("Mouth-to-Mouth Ventilation"[All Fields] OR "Chest Wall Oscillation"[Mesh] OR Chest-compression) AND (clinicaltrial[Filter] OR | ("Cardiopulmonary Resuscitation"[Mesh] OR "Out-of-Hospital Cardiac Arrest"[Mesh]) AND ("Mouth-to-Mouth Ventilation"[All Fields] OR "Chest Wall Oscillation"[Mesh] OR Chest-compression) AND (meta-analysis[Filter] OR |

|    |                                                                                                                                                                                  |                                                                                                                            |                                                                                                                                                                                             |                                                                                                                                                                                    |
|----|----------------------------------------------------------------------------------------------------------------------------------------------------------------------------------|----------------------------------------------------------------------------------------------------------------------------|---------------------------------------------------------------------------------------------------------------------------------------------------------------------------------------------|------------------------------------------------------------------------------------------------------------------------------------------------------------------------------------|
|    |                                                                                                                                                                                  |                                                                                                                            | randomizedcontrolledtrial[Filter])                                                                                                                                                          | systematicreview[Filter])                                                                                                                                                          |
| 21 | Cognitive decline in women in relation to non-protein-bound oestradiol concentrations.<br><i>Lancet. 2000 Aug 26;356(9231):708-12.</i>                                           | ("Estradiol"[Mesh] OR "Estrogen Replacement Therapy"[Mesh]) AND ("Cognition"[Mesh] OR Cognitive[All Fields])               | ("Estradiol"[Mesh] OR "Estrogen Replacement Therapy"[Mesh]) AND ("Cognition"[Mesh] OR Cognitive[All Fields]) AND (clinicaltrial[Filter] OR randomizedcontrolledtrial[Filter])               | ("Estradiol"[Mesh] OR "Estrogen Replacement Therapy"[Mesh]) AND ("Cognition"[Mesh] OR Cognitive[All Fields]) AND (meta-analysis[Filter] OR systematicreview[Filter])               |
| 22 | Community water fluoridation, bone mineral density, and fractures: prospective study of effects in older women.<br><i>BMJ. 2000 Oct 7;321(7265):860-4.</i>                       | "Fluoridation"[Mesh] OR "Fluorid                                                                                           | "Fluoridation"[Mesh] OR "Fluorides"[Mesh] AND (clinicaltrial[Filter] OR randomizedcontrolledtrial[Filter])                                                                                  | "Fluoridation"[Mesh] OR "Fluorides"[Mesh] AND (meta-analysis[Filter] OR systematicreview[Filter])                                                                                  |
| 23 | Comparison of leg compression stocking and oral horse-chestnut seed extract therapy in patients with chronic venous insufficiency.<br><i>Lancet. 1996 Feb 3;347(8997):292-4.</i> | "Venous Insufficiency"[Mesh] AND ("Aesculus"[Mesh] OR "Horse-chestnut"[All Fields])                                        | "Venous Insufficiency"[Mesh] AND ("Aesculus"[Mesh] OR "Horse-chestnut"[All Fields]) AND (clinicaltrial[Filter] OR randomizedcontrolledtrial[Filter])                                        | "Venous Insufficiency"[Mesh] AND ("Aesculus"[Mesh] OR "Horse-chestnut"[All Fields]) AND (meta-analysis[Filter] OR systematicreview[Filter])                                        |
| 24 | Comparison of lifestyle and structured interventions to increase physical activity and cardiorespiratory fitness: a randomized trial.<br><i>JAMA. 1999 Jan 27;281(4):327-34.</i> | ("Life Style"[Mesh] OR "Exercise"[Mesh]) OR "Health Promotion"[Mesh] AND ("Risk Factors"[Mesh] OR "Health Behavior"[Mesh]) | ("Life Style"[Mesh] OR "Exercise"[Mesh]) OR "Health Promotion"[Mesh] AND ("Risk Factors"[Mesh] OR "Health Behavior"[Mesh]) AND (clinicaltrial[Filter] OR randomizedcontrolledtrial[Filter]) | ("Life Style"[Mesh] OR "Exercise"[Mesh]) OR "Health Promotion"[Mesh] AND ("Risk Factors"[Mesh] OR "Health Behavior"[Mesh]) AND (meta-analysis[Filter] OR systematicreview[Filter]) |
| 25 | Comparison of St John's wort and imipramine for treating depression: randomised controlled trial.<br><i>BMJ. 2000 Sep 2;321(7260):536-9.</i>                                     | "Depressive Disorder"[Mesh] AND "Hypericum"[Mesh]                                                                          | "Depressive Disorder"[Mesh] AND "Hypericum"[Mesh] AND (clinicaltrial[Filter] OR randomizedcontrolledtrial[Filter])                                                                          | "Depressive Disorder"[Mesh] AND "Hypericum"[Mesh] AND (meta-analysis[Filter] OR systematicreview[Filter])                                                                          |
| 26 | Comparison of wet combing with malathion for treatment of head lice in the UK: a pragmatic randomised controlled trial.<br><i>Lancet. 2000 Aug 12;356(9229):540-4.</i>           | "Phthiraptera"[Mesh] AND "Malathion"[Mesh]                                                                                 | "Phthiraptera"[Mesh] AND "Malathion"[Mesh] AND (clinicaltrial[Filter] OR randomizedcontrolledtrial[Filter])                                                                                 | "Phthiraptera"[Mesh] AND "Malathion"[Mesh] AND (meta-analysis[Filter] OR systematicreview[Filter])                                                                                 |
| 27 | Dexamethasone alone or in combination with                                                                                                                                       | ("Dexamethasone"[Mesh] AND "Ondansetron"[Mesh]) AND                                                                        | ("Dexamethasone"[Mesh] AND "Ondansetron"[Mesh]) AND                                                                                                                                         | ("Dexamethasone"[Mesh] AND "Ondansetron"[Mesh]) AND                                                                                                                                |

|    |                                                                                                                                                                                                                                          |                                                                                                                                                                             |                                                                                                                                                                                                                                              |                                                                                                                                                                                                                                     |
|----|------------------------------------------------------------------------------------------------------------------------------------------------------------------------------------------------------------------------------------------|-----------------------------------------------------------------------------------------------------------------------------------------------------------------------------|----------------------------------------------------------------------------------------------------------------------------------------------------------------------------------------------------------------------------------------------|-------------------------------------------------------------------------------------------------------------------------------------------------------------------------------------------------------------------------------------|
|    | ondansetron for the prevention of delayed nausea and vomiting induced by chemotherapy. The Italian Group for Antiemetic Research.<br><br><i>N Engl J Med. 2000 May 25;342(21):1554-9.</i>                                                | ("Nausea"[Mesh] OR "Vomiting"[Mesh])                                                                                                                                        | ("Nausea"[Mesh] OR "Vomiting"[Mesh]) AND (clinicaltrial[Filter] OR randomizedcontrolledtrial[Filter])                                                                                                                                        | ("Nausea"[Mesh] OR "Vomiting"[Mesh]) AND (meta-analysis[Filter] OR systematicreview[Filter])                                                                                                                                        |
| 28 | Directly observed therapy for treatment completion of pulmonary tuberculosis: Consensus Statement of the Public Health Tuberculosis Guidelines Panel.<br><br><i>JAMA. 1998 Mar 25;279(12):943-8.</i>                                     | "Directly Observed Therapy"[MeSH] AND "Patient Compliance"[Mesh]                                                                                                            | "Directly Observed Therapy"[MeSH] AND "Patient Compliance"[Mesh] AND (clinicaltrial[Filter] OR randomizedcontrolledtrial[Filter])                                                                                                            | "Directly Observed Therapy"[MeSH] AND "Patient Compliance"[Mesh] AND (meta-analysis[Filter] OR systematicreview[Filter])                                                                                                            |
| 29 | Efavirenz plus zidovudine and lamivudine, efavirenz plus indinavir, and indinavir plus zidovudine and lamivudine in the treatment of HIV-1 infection in adults. Study 006 Team.<br><br><i>N Engl J Med. 1999 Dec 16;341(25):1865-73.</i> | "HIV Infections"[Mesh] AND ("Oxazines"[Mesh] OR "Zidovudine"[Mesh] OR "Lamivudine"[Mesh] OR "Indinavir"[Mesh] OR "Zidovudine"[Mesh] OR "HIV Infections/drug therapy"[Mesh]) | "HIV Infections"[Mesh] AND ("Oxazines"[Mesh] OR "Zidovudine"[Mesh] OR "Lamivudine"[Mesh] OR "Indinavir"[Mesh] OR "Zidovudine"[Mesh] OR "HIV Infections/drug therapy"[Mesh]) AND (clinicaltrial[Filter] OR randomizedcontrolledtrial[Filter]) | "HIV Infections"[Mesh] AND ("Oxazines"[Mesh] OR "Zidovudine"[Mesh] OR "Lamivudine"[Mesh] OR "Indinavir"[Mesh] OR "Zidovudine"[Mesh] OR "HIV Infections/drug therapy"[Mesh]) AND (meta-analysis[Filter] OR systematicreview[Filter]) |
| 30 | Effect of a surgical training programme on outcome of rectal cancer in the County of Stockholm. Stockholm Colorectal Cancer Study Group, Basingstoke Bowel Cancer Research Project.<br><br><i>Lancet. 2000 Jul 8;356(9224):93-6.</i>     | "Rectal Neoplasms"[Mesh] AND "Education, Continuing"[Mesh]                                                                                                                  | "Rectal Neoplasms"[Mesh] AND "Education, Continuing"[Mesh] AND (clinicaltrial[Filter] OR randomizedcontrolledtrial[Filter])                                                                                                                  | "Rectal Neoplasms"[Mesh] AND "Education, Continuing"[Mesh] AND (meta-analysis[Filter] OR systematicreview[Filter])                                                                                                                  |
| 31 | Effect of breastfeeding and formula feeding on transmission of HIV-1: a randomized clinical trial.<br><br><i>JAMA. 2000 Mar 1;283(9):1167-74.</i>                                                                                        | "HIV-1"[Mesh] AND "Breast Feeding"[Mesh]                                                                                                                                    | "HIV-1"[Mesh] AND "Breast Feeding"[Mesh] AND (clinicaltrial[Filter] OR randomizedcontrolledtrial[Filter])                                                                                                                                    | "HIV-1"[Mesh] AND "Breast Feeding"[Mesh] AND (meta-analysis[Filter] OR systematicreview[Filter])                                                                                                                                    |
| 32 | Effect of decreasing afferent vagal activity with ondansetron on symptoms of bulimia nervosa: a randomised, double-blind trial.<br><br><i>Lancet. 2000 Mar 4;355(9206):792-7.</i>                                                        | "Bulimia Nervosa/therapy"[Mesh]                                                                                                                                             | "Bulimia Nervosa/therapy"[Mesh] AND (clinicaltrial[Filter] OR randomizedcontrolledtrial[Filter])                                                                                                                                             | "Bulimia Nervosa/therapy"[Mesh] AND (meta-analysis[Filter] OR systematicreview[Filter])                                                                                                                                             |

|    |                                                                                                                                                                                                                             |                                                                                                                |                                                                                                                                                                                 |                                                                                                                                                                        |
|----|-----------------------------------------------------------------------------------------------------------------------------------------------------------------------------------------------------------------------------|----------------------------------------------------------------------------------------------------------------|---------------------------------------------------------------------------------------------------------------------------------------------------------------------------------|------------------------------------------------------------------------------------------------------------------------------------------------------------------------|
| 33 | Effect of exercise on coronary endothelial function in patients with coronary artery disease.<br><i>N Engl J Med. 2000 Feb 17;342(7):454-60.</i>                                                                            | "Coronary Disease"[Mesh] AND ("Exercise"[Mesh] OR "Exercise Therapy"[Mesh])                                    | "Coronary Disease"[Mesh] AND ("Exercise"[Mesh] OR "Exercise Therapy"[Mesh]) AND (clinicaltrial[Filter] OR randomizedcontrolledtrial[Filter])                                    | "Coronary Disease"[Mesh] AND ("Exercise"[Mesh] OR "Exercise Therapy"[Mesh]) AND (meta-analysis[Filter] OR systematicreview[Filter])                                    |
| 34 | Effect of lung-volume-reduction surgery in patients with severe emphysema.<br><i>N Engl J Med. 2000 Jul 27;343(4):239-45.</i>                                                                                               | ("Emphysema"[Mesh] OR "Pulmonary Emphysema"[Mesh]) AND "Pneumectomy"[Mesh]                                     | ("Emphysema"[Mesh] OR "Pulmonary Emphysema"[Mesh]) AND "Pneumectomy"[Mesh] AND (clinicaltrial[Filter] OR randomizedcontrolledtrial[Filter])                                     | ("Emphysema"[Mesh] OR "Pulmonary Emphysema"[Mesh]) AND "Pneumectomy"[Mesh] AND (meta-analysis[Filter] OR systematicreview[Filter])                                     |
| 35 | Effectiveness of a hospital-wide programme to improve compliance with hand hygiene. Infection Control Programme.<br><i>Lancet. 2000 Oct 14;356(9238):1307-12.</i>                                                           | ("Hand Hygiene"[Mesh] OR "Hand Disinfection"[Mesh]) AND ("Cross Infection"[Mesh] OR "Infection Control"[Mesh]) | ("Hand Hygiene"[Mesh] OR "Hand Disinfection"[Mesh]) AND ("Cross Infection"[Mesh] OR "Infection Control"[Mesh]) AND (clinicaltrial[Filter] OR randomizedcontrolledtrial[Filter]) | ("Hand Hygiene"[Mesh] OR "Hand Disinfection"[Mesh]) AND ("Cross Infection"[Mesh] OR "Infection Control"[Mesh]) AND (meta-analysis[Filter] OR systematicreview[Filter]) |
| 36 | Effectiveness of manual physical therapy and exercise in osteoarthritis of the knee. A randomized, controlled trial.<br><i>Ann Intern Med. 2000 Feb 1;132(3):173-81.</i>                                                    | "Osteoarthritis, Knee"[Mesh] AND ("Exercise Therapy"[Mesh] OR "Physical Therapy Modalities"[Mesh])             | "Osteoarthritis, Knee"[Mesh] AND ("Exercise Therapy"[Mesh] OR "Physical Therapy Modalities"[Mesh]) AND (clinicaltrial[Filter] OR randomizedcontrolledtrial[Filter])             | "Osteoarthritis, Knee"[Mesh] AND ("Exercise Therapy"[Mesh] OR "Physical Therapy Modalities"[Mesh]) AND (meta-analysis[Filter] OR systematicreview[Filter])             |
| 37 | Effects of selenium supplementation for cancer prevention in patients with carcinoma of the skin. A randomized controlled trial. Nutritional Prevention of Cancer Study Group.<br><i>JAMA. 1996 Dec 25;276(24):1957-63.</i> | ("Skin Neoplasms"[Mesh] OR "Carcinoma, Skin Appendage"[Mesh]) AND "Selenium"[Mesh]                             | ("Skin Neoplasms"[Mesh] OR "Carcinoma, Skin Appendage"[Mesh]) AND "Selenium"[Mesh] AND (clinicaltrial[Filter] OR randomizedcontrolledtrial[Filter])                             | ("Skin Neoplasms"[Mesh] OR "Carcinoma, Skin Appendage"[Mesh]) AND "Selenium"[Mesh] AND (meta-analysis[Filter] OR systematicreview[Filter])                             |
| 38 | Efficacy and safety of acetaminophen in the treatment of migraine: results of a randomized, double-blind, placebo-controlled, population-based study.<br><i>Arch Intern Med. 2000 Dec 11-25;160(22):3486-92.</i>            | "Migraine Disorders"[Mesh] AND "Acetaminophen"[Mesh]                                                           | "Migraine Disorders"[Mesh] AND "Acetaminophen"[Mesh] AND (clinicaltrial[Filter] OR randomizedcontrolledtrial[Filter])                                                           | "Migraine Disorders"[Mesh] AND "Acetaminophen"[Mesh] AND (meta-analysis[Filter] OR systematicreview[Filter])                                                           |
| 39 | Efficacy and safety of sertraline treatment of posttraumatic stress disorder: a randomized controlled                                                                                                                       | "Stress Disorders, Post-Traumatic/drug therapy"[Mesh]                                                          | "Stress Disorders, Post-Traumatic/drug therapy"[Mesh] AND (clinicaltrial[Filter] OR randomizedcontrolledtrial[Filter])                                                          | "Stress Disorders, Post-Traumatic/drug therapy"[Mesh] AND (meta-analysis[Filter] OR systematicreview[Filter])                                                          |

|    |                                                                                                                                                                                                                                                      |                                                                                                                                                                            |                                                                                                                                                                                                                                             |                                                                                                                                                                                                                                    |
|----|------------------------------------------------------------------------------------------------------------------------------------------------------------------------------------------------------------------------------------------------------|----------------------------------------------------------------------------------------------------------------------------------------------------------------------------|---------------------------------------------------------------------------------------------------------------------------------------------------------------------------------------------------------------------------------------------|------------------------------------------------------------------------------------------------------------------------------------------------------------------------------------------------------------------------------------|
|    | trial.<br><i>JAMA. 2000 Apr 12;283(14):1837-44.</i>                                                                                                                                                                                                  |                                                                                                                                                                            |                                                                                                                                                                                                                                             |                                                                                                                                                                                                                                    |
| 40 | Efficacy of selective serotonin-reuptake inhibitors in premenstrual syndrome: a systematic review.<br><i>Lancet. 2000 Sep 30;356(9236):1131-6.</i>                                                                                                   | "Premenstrual Syndrome"[Mesh] AND "Serotonin Uptake Inhibitors"[Mesh]                                                                                                      | "Premenstrual Syndrome"[Mesh] AND "Serotonin Uptake Inhibitors"[Mesh] AND (clinicaltrial[Filter] OR randomizedcontrolledtrial[Filter])                                                                                                      | "Premenstrual Syndrome"[Mesh] AND "Serotonin Uptake Inhibitors"[Mesh] AND (meta-analysis[Filter] OR systematicreview[Filter])                                                                                                      |
| 41 | Efficacy of voluntary HIV-1 counselling and testing in individuals and couples in Kenya, Tanzania, and Trinidad: a randomised trial. The Voluntary HIV-1 Counseling and Testing Efficacy Study Group.<br><i>Lancet. 2000 Jul 8;356(9224):103-12.</i> | "HIV Infections"[Mesh] AND ("Counseling"[Mesh] OR "AIDS Serodiagnosis"[Mesh]) AND "Sexual Behavior"[Mesh]                                                                  | "HIV Infections"[Mesh] AND ("Counseling"[Mesh] OR "AIDS Serodiagnosis"[Mesh]) AND "Sexual Behavior"[Mesh] AND (clinicaltrial[Filter] OR randomizedcontrolledtrial[Filter])                                                                  | "HIV Infections"[Mesh] AND ("Counseling"[Mesh] OR "AIDS Serodiagnosis"[Mesh]) AND "Sexual Behavior"[Mesh] AND (meta-analysis[Filter] OR systematicreview[Filter])                                                                  |
| 42 | Enduring effects of nurse home visitation on maternal life course: a 3-year follow-up of a randomized trial.<br><i>JAMA. 2000 Apr 19;283(15):1983-9.</i>                                                                                             | ("Home Care Services"[Mesh] OR "Community Health Workers"[Mesh] OR "Professional-Family Relations"[Mesh] OR "House Calls"[Mesh]) AND ("Infant"[Mesh] OR "Pregnancy"[Mesh]) | ("Home Care Services"[Mesh] OR "Community Health Workers"[Mesh] OR "Professional-Family Relations"[Mesh] OR "House Calls"[Mesh]) AND ("Infant"[Mesh] OR "Pregnancy"[Mesh]) AND (clinicaltrial[Filter] OR randomizedcontrolledtrial[Filter]) | ("Home Care Services"[Mesh] OR "Community Health Workers"[Mesh] OR "Professional-Family Relations"[Mesh] OR "House Calls"[Mesh]) AND ("Infant"[Mesh] OR "Pregnancy"[Mesh]) AND (meta-analysis[Filter] OR systematicreview[Filter]) |
| 43 | Etanercept in children with polyarticular juvenile rheumatoid arthritis. Pediatric Rheumatology Collaborative Study Group.<br><i>N Engl J Med. 2000 Mar 16;342(11):763-9.</i>                                                                        | "Arthritis, Juvenile"[Mesh] AND "Etanercept"[Mesh]                                                                                                                         | "Arthritis, Juvenile"[Mesh] AND "Etanercept"[Mesh] AND (clinicaltrial[Filter] OR randomizedcontrolledtrial[Filter])                                                                                                                         | "Arthritis, Juvenile"[Mesh] AND "Etanercept"[Mesh] AND (meta-analysis[Filter] OR systematicreview[Filter])                                                                                                                         |
| 44 | Exercise and weight loss reduce blood pressure in men and women with mild hypertension: effects on cardiovascular, metabolic, and hemodynamic functioning.<br><i>Arch Intern Med. 2000 Jul 10;160(13):1947-58.</i>                                   | "Hypertension"[Mesh] AND ("Exercise"[Mesh] OR "Weight Loss"[Mesh])                                                                                                         | "Hypertension"[Mesh] AND ("Exercise"[Mesh] OR "Weight Loss"[Mesh]) AND (clinicaltrial[Filter] OR randomizedcontrolledtrial[Filter])                                                                                                         | "Hypertension"[Mesh] AND ("Exercise"[Mesh] OR "Weight Loss"[Mesh]) AND (meta-analysis[Filter] OR systematicreview[Filter])                                                                                                         |
| 45 | Folic acid antagonists during pregnancy and the risk of                                                                                                                                                                                              | "Pregnancy"[Mesh] AND "Folic Acid Antagonists"[Mesh]                                                                                                                       | "Pregnancy"[Mesh] AND "Folic Acid Antagonists"[Mesh] AND                                                                                                                                                                                    | "Pregnancy"[Mesh] AND "Folic Acid Antagonists"[Mesh] (meta-                                                                                                                                                                        |

|    |                                                                                                                                                                                                                                                                        |                                                                                                                                                        |                                                                                                                                                                                                                         |                                                                                                                                                                                                                |
|----|------------------------------------------------------------------------------------------------------------------------------------------------------------------------------------------------------------------------------------------------------------------------|--------------------------------------------------------------------------------------------------------------------------------------------------------|-------------------------------------------------------------------------------------------------------------------------------------------------------------------------------------------------------------------------|----------------------------------------------------------------------------------------------------------------------------------------------------------------------------------------------------------------|
|    | birth defects.<br><i>N Engl J Med. 2000 Nov 30;343(22):1608-14.</i>                                                                                                                                                                                                    |                                                                                                                                                        | (clinicaltrial[Filter] OR randomizedcontrolledtrial[Filter])                                                                                                                                                            | analysis[Filter] OR systematicreview[Filter])                                                                                                                                                                  |
| 46 | Gastrointestinal toxicity with celecoxib vs nonsteroidal anti-inflammatory drugs for osteoarthritis and rheumatoid arthritis: the CLASS study: A randomized controlled trial. Celecoxib Long-term Arthritis Safety Study.<br><i>JAMA. 2000 Sep 13;284(10):1247-55.</i> | ("Osteoarthritis"[Mesh]) OR "Arthritis, Rheumatoid"[Mesh] AND ("Celecoxib/adverse effects"[Mesh] OR "Cyclooxygenase Inhibitors/adverse effects"[Mesh]) | ("Osteoarthritis"[Mesh]) OR "Arthritis, Rheumatoid"[Mesh] AND ("Celecoxib/adverse effects"[Mesh] OR "Cyclooxygenase Inhibitors/adverse effects"[Mesh]) AND (clinicaltrial[Filter] OR randomizedcontrolledtrial[Filter]) | ("Osteoarthritis"[Mesh]) OR "Arthritis, Rheumatoid"[Mesh] AND ("Celecoxib/adverse effects"[Mesh] OR "Cyclooxygenase Inhibitors/adverse effects"[Mesh]) AND (meta-analysis[Filter] OR systematicreview[Filter]) |
| 47 | Glucosamine and chondroitin for treatment of osteoarthritis: a systematic quality assessment and meta-analysis.<br><i>JAMA. 2000 Mar 15;283(11):1469-75.</i>                                                                                                           | "Osteoarthritis"[Mesh] AND ("Glucosamine"[Mesh] OR "Chondroitin"[Mesh])                                                                                | "Osteoarthritis"[Mesh] AND ("Glucosamine"[Mesh] OR "Chondroitin"[Mesh]) AND (clinicaltrial[Filter] OR randomizedcontrolledtrial[Filter])                                                                                | "Osteoarthritis"[Mesh] AND ("Glucosamine"[Mesh] OR "Chondroitin"[Mesh]) AND (meta-analysis[Filter] OR systematicreview[Filter])                                                                                |
| 48 | Group B streptococcal disease in the era of intrapartum antibiotic prophylaxis.<br><i>N Engl J Med. 2000 Jan 6;342(1):15-20.</i>                                                                                                                                       | "Streptococcal Infections"[Mesh] AND "Antibiotic Prophylaxis"[Mesh]                                                                                    | "Streptococcal Infections"[Mesh] AND "Antibiotic Prophylaxis"[Mesh] AND (clinicaltrial[Filter] OR randomizedcontrolledtrial[Filter])                                                                                    | "Streptococcal Infections"[Mesh] AND "Antibiotic Prophylaxis"[Mesh] AND (meta-analysis[Filter] OR systematicreview[Filter])                                                                                    |
| 49 | HMG-CoA reductase inhibitors and the risk of fractures.<br><i>JAMA. 2000 Jun 28;283(24):3205-10.</i>                                                                                                                                                                   | "Hydroxymethylglutaryl-CoA Reductase Inhibitors"[Mesh] AND ("Bone and Bones"[Mesh] OR "Fractures, Bone"[Mesh])                                         | "Hydroxymethylglutaryl-CoA Reductase Inhibitors"[Mesh] AND ("Bone and Bones"[Mesh] OR "Fractures, Bone"[Mesh]) AND (clinicaltrial[Filter] OR randomizedcontrolledtrial[Filter])                                         | "Hydroxymethylglutaryl-CoA Reductase Inhibitors"[Mesh] AND ("Bone and Bones"[Mesh] OR "Fractures, Bone"[Mesh]) AND (meta-analysis[Filter] OR systematicreview[Filter])                                         |
| 50 | Homicide and suicide rates associated with implementation of the Brady Handgun Violence Prevention Act.<br><i>JAMA. 2000 Aug 2;284(5):585-91.</i>                                                                                                                      | ("Firearms"[Mesh] OR "Violence/prevention and control"[Mesh]) AND ("Homicide"[Mesh] OR "Suicide"[Mesh])                                                | ("Firearms"[Mesh] OR "Violence/prevention and control"[Mesh]) AND ("Homicide"[Mesh] OR "Suicide"[Mesh]) AND (clinicaltrial[Filter] OR randomizedcontrolledtrial[Filter])                                                | ("Firearms"[Mesh] OR "Violence/prevention and control"[Mesh]) AND ("Homicide"[Mesh] OR "Suicide"[Mesh]) AND (meta-analysis[Filter] OR systematicreview[Filter])                                                |
| 51 | Hypericum extract versus imipramine or placebo in patients with moderate depression: randomised multicentre study of treatment for eight weeks.                                                                                                                        | "Depressive Disorder"[Mesh] AND "Hypericum"[Mesh]                                                                                                      | "Depressive Disorder"[Mesh] AND "Hypericum"[Mesh] AND (clinicaltrial[Filter] OR randomizedcontrolledtrial[Filter])                                                                                                      | "Depressive Disorder"[Mesh] AND "Hypericum"[Mesh] AND (meta-analysis[Filter] OR systematicreview[Filter])                                                                                                      |



|    |                                                                                                                                                                                      |                                                                                                                                 |                                                                                                                                                                                                  |                                                                                                                                                                                         |
|----|--------------------------------------------------------------------------------------------------------------------------------------------------------------------------------------|---------------------------------------------------------------------------------------------------------------------------------|--------------------------------------------------------------------------------------------------------------------------------------------------------------------------------------------------|-----------------------------------------------------------------------------------------------------------------------------------------------------------------------------------------|
|    | <i>BMJ. 1999 Dec 11;319(7224):1534-8.</i>                                                                                                                                            |                                                                                                                                 |                                                                                                                                                                                                  |                                                                                                                                                                                         |
| 52 | Immunologic and virologic effects of subcutaneous interleukin 2 in combination with antiretroviral therapy: A randomized controlled trial.<br><i>JAMA. 2000 Jul 12;284(2):183-9.</i> | "HIV Infections"[Mesh] AND "Interleukin-2"[Mesh] AND "Anti-HIV Agents"[Mesh]                                                    | "HIV Infections"[Mesh] AND "Interleukin-2"[Mesh] AND "Anti-HIV Agents"[Mesh] AND (clinicaltrial[Filter] OR randomizedcontrolledtrial[Filter])                                                    | "HIV Infections"[Mesh] AND "Interleukin-2"[Mesh] AND "Anti-HIV Agents"[Mesh] (meta-analysis[Filter] OR systematicreview[Filter])                                                        |
| 53 | Impact of zanamivir on antibiotic use for respiratory events following acute influenza in adolescents and adults.<br><i>Arch Intern Med. 2000 Nov 27;160(21):3234-40.</i>            | "Influenza, Human"[Mesh] AND ("Antiviral Agents"[Mesh] OR "Zanamivir"[Mesh]) AND "Respiratory Tract Infections"[Mesh]           | "Influenza, Human"[Mesh] AND ("Antiviral Agents"[Mesh] OR "Zanamivir"[Mesh]) AND "Respiratory Tract Infections"[Mesh] AND (clinicaltrial[Filter] OR randomizedcontrolledtrial[Filter])           | "Influenza, Human"[Mesh] AND ("Antiviral Agents"[Mesh] OR "Zanamivir"[Mesh]) AND "Respiratory Tract Infections"[Mesh] AND (meta-analysis[Filter] OR systematicreview[Filter])           |
| 54 | Incidence of cancer after prophylaxis with warfarin against recurrent venous thromboembolism. Duration of Anticoagulation Trial.<br><i>N Engl J Med. 2000 Jun 29;342(26):1953-8.</i> | "Thromboembolism"[Mesh] AND ("Warfarin"[Mesh] OR "Anticoagulants"[Mesh]) AND ("Incidence"[Mesh] AND "Neoplasms"[Mesh])          | "Thromboembolism"[Mesh] AND ("Warfarin"[Mesh] OR "Anticoagulants"[Mesh]) AND ("Incidence"[Mesh] AND "Neoplasms"[Mesh]) AND (clinicaltrial[Filter] OR randomizedcontrolledtrial[Filter])          | "Thromboembolism"[Mesh] AND ("Warfarin"[Mesh] OR "Anticoagulants"[Mesh]) AND ("Incidence"[Mesh] AND "Neoplasms"[Mesh]) AND (meta-analysis[Filter] OR systematicreview[Filter])          |
| 55 | Influenza vaccination and the risk of primary cardiac arrest.<br><i>Am J Epidemiol. 2000 Oct 1;152(7):674-7.</i>                                                                     | "Influenza Vaccines"[Mesh] AND ("Heart Arrest"[Mesh] OR "Cardiovascular Diseases"[Mesh])                                        | "Influenza Vaccines"[Mesh] AND ("Heart Arrest"[Mesh] OR "Cardiovascular Diseases"[Mesh]) AND (clinicaltrial[Filter] OR randomizedcontrolledtrial[Filter])                                        | "Influenza Vaccines"[Mesh] AND ("Heart Arrest"[Mesh] OR "Cardiovascular Diseases"[Mesh]) AND (meta-analysis[Filter] OR systematicreview[Filter])                                        |
| 56 | Inhaled zanamivir for the prevention of influenza in families. Zanamivir Family Study Group.<br><i>N Engl J Med. 2000 Nov 2;343(18):1282-9.</i>                                      | "Influenza, Human"[Mesh] AND ("Zanamivir"[Mesh] OR "Neuraminidase/antagonists and inhibitors"[MeSH])                            | "Influenza, Human"[Mesh] AND ("Zanamivir"[Mesh] OR "Neuraminidase/antagonists and inhibitors"[MeSH]) AND (clinicaltrial[Filter] OR randomizedcontrolledtrial[Filter])                            | "Influenza, Human"[Mesh] AND ("Zanamivir"[Mesh] OR "Neuraminidase/antagonists and inhibitors"[MeSH]) AND (meta-analysis[Filter] OR systematicreview[Filter])                            |
| 57 | Inhibitors of hydroxymethylglutaryl-coenzyme A reductase and risk of fracture among older women.<br><i>Lancet. 2000 Jun 24;355(9222):2185-8.</i>                                     | "Female"[Mesh] AND "Hydroxymethylglutaryl-CoA Reductase Inhibitors"[Mesh] AND ("Fractures, Bone"[Mesh] OR "Bone Density"[Mesh]) | "Female"[Mesh] AND "Hydroxymethylglutaryl-CoA Reductase Inhibitors"[Mesh] AND ("Fractures, Bone"[Mesh] OR "Bone Density"[Mesh]) AND (clinicaltrial[Filter] OR randomizedcontrolledtrial[Filter]) | "Female"[Mesh] AND "Hydroxymethylglutaryl-CoA Reductase Inhibitors"[Mesh] AND ("Fractures, Bone"[Mesh] OR "Bone Density"[Mesh]) AND (meta-analysis[Filter] OR systematicreview[Filter]) |
| 58 | Irinotecan plus fluorouracil and leucovorin for metastatic colorectal cancer. Irinotecan Study Group.                                                                                | "Colorectal Neoplasms"[Mesh] AND ("Irinotecan"[Mesh] OR "Fluorouracil"[Mesh] OR "Leucovorin"[Mesh] OR                           | "Colorectal Neoplasms"[Mesh] AND ("Irinotecan"[Mesh] OR "Fluorouracil"[Mesh] OR "Leucovorin"[Mesh] OR                                                                                            | "Colorectal Neoplasms"[Mesh] AND ("Irinotecan"[Mesh] OR "Fluorouracil"[Mesh] OR "Leucovorin"[Mesh] OR "Antineoplastic                                                                   |

|    |                                                                                                                                                                                         |                                                                                                                                               |                                                                                                                                                                                                                |                                                                                                                                                                                                       |
|----|-----------------------------------------------------------------------------------------------------------------------------------------------------------------------------------------|-----------------------------------------------------------------------------------------------------------------------------------------------|----------------------------------------------------------------------------------------------------------------------------------------------------------------------------------------------------------------|-------------------------------------------------------------------------------------------------------------------------------------------------------------------------------------------------------|
|    | <i>N Engl J Med.</i> 2000 Sep 28;343(13):905-14.                                                                                                                                        | "Antineoplastic Combined Chemotherapy Protocols"[Mesh]                                                                                        | "Antineoplastic Combined Chemotherapy Protocols"[Mesh]<br>AND (clinicaltrial[Filter] OR randomizedcontrolledtrial[Filter])                                                                                     | Combined Chemotherapy Protocols"[Mesh] AND (meta-analysis[Filter] OR systematicreview[Filter])                                                                                                        |
| 59 | Islet transplantation in seven patients with type 1 diabetes mellitus using a glucocorticoid-free immunosuppressive regimen.<br><br><i>N Engl J Med.</i> 2000 Jul 27;343(4):230-8.      | "diabetes mellitus, type 1"[MeSH Terms] AND "Islets of Langerhans Transplantation"[MeSH Terms]                                                | ("diabetes mellitus, type 1"[MeSH Terms] AND "Islets of Langerhans Transplantation"[MeSH Terms]) AND (clinicaltrial[Filter] OR randomizedcontrolledtrial[Filter])                                              | ("diabetes mellitus, type 1"[MeSH Terms] AND "Islets of Langerhans Transplantation"[MeSH Terms]) AND (meta-analysis[Filter] OR systematicreview[Filter])                                              |
| 60 | Lamivudine as initial treatment for chronic hepatitis B in the United States.<br><br><i>N Engl J Med.</i> 1999 Oct 21;341(17):1256-63.                                                  | "Hepatitis B, Chronic"[Mesh] AND ("Lamivudine"[Mesh] OR "Reverse Transcriptase Inhibitors"[Mesh] OR "Antiviral Agents"[Mesh])                 | "Hepatitis B, Chronic"[Mesh] AND ("Lamivudine"[Mesh] OR "Reverse Transcriptase Inhibitors"[Mesh] OR "Antiviral Agents"[Mesh]) AND (clinicaltrial[Filter] OR randomizedcontrolledtrial[Filter])                 | "Hepatitis B, Chronic"[Mesh] AND ("Lamivudine"[Mesh] OR "Reverse Transcriptase Inhibitors"[Mesh] OR "Antiviral Agents"[Mesh]) AND (meta-analysis[Filter] OR systematicreview[Filter])                 |
| 61 | Lipid concentrations and the use of lipid lowering drugs: evidence from a national cross sectional survey.<br><br><i>BMJ.</i> 2000 Nov 25;321(7272):1322-5.                             | "Hypolipidemic Agents"[Mesh] AND ("Cholesterol concentration" OR "Lipid concentration")                                                       | "Hypolipidemic Agents"[Mesh] AND ("Cholesterol concentration" OR "Lipid concentration") AND (clinicaltrial[Filter] OR randomizedcontrolledtrial[Filter])                                                       | "Hypolipidemic Agents"[Mesh] AND ("Cholesterol concentration" OR "Lipid concentration") AND (meta-analysis[Filter] OR systematicreview[Filter])                                                       |
| 62 | Long-term effects of budesonide or nedocromil in children with asthma. The Childhood Asthma Management Program Research Group.<br><br><i>N Engl J Med.</i> 2000 Oct 12;343(15):1054-63. | ("Asthma"[Mesh] AND "Child"[Mesh]) AND ("Budesonide"[Mesh] OR "Nedocromil"[Mesh] OR "Glucocorticoids"[Mesh] OR "Anti-Asthmatic Agents"[Mesh]) | ("Asthma"[Mesh] AND "Child"[Mesh]) AND ("Budesonide"[Mesh] OR "Nedocromil"[Mesh] OR "Glucocorticoids"[Mesh] OR "Anti-Asthmatic Agents"[Mesh]) AND (clinicaltrial[Filter] OR randomizedcontrolledtrial[Filter]) | ("Asthma"[Mesh] AND "Child"[Mesh]) AND ("Budesonide"[Mesh] OR "Nedocromil"[Mesh] OR "Glucocorticoids"[Mesh] OR "Anti-Asthmatic Agents"[Mesh]) AND (meta-analysis[Filter] OR systematicreview[Filter]) |
| 63 | Low cardiorespiratory fitness and physical inactivity as predictors of mortality in men with type 2 diabetes.<br><br><i>Ann Intern Med.</i> 2000 Apr 18;132(8):605-11.                  | "Diabetes Mellitus"[Mesh] AND ("Physical Fitness"[Mesh] OR "Motor Activity"[Mesh])                                                            | "Diabetes Mellitus"[Mesh] AND ("Physical Fitness"[Mesh] OR "Motor Activity"[Mesh]) AND (clinicaltrial[Filter] OR randomizedcontrolledtrial[Filter])                                                            | "Diabetes Mellitus"[Mesh] AND ("Physical Fitness"[Mesh] OR "Motor Activity"[Mesh]) AND (meta-analysis[Filter] OR systematicreview[Filter])                                                            |
| 64 | Low-dose inhaled corticosteroids and the prevention of death from asthma.<br><br><i>N Engl J Med.</i> 2000 Aug 3;343(5):332-6.                                                          | ("Asthma"[Mesh] OR "Pulmonary Disease, Chronic Obstructive"[Mesh]) AND ("Glucocorticoids"[Mesh] OR "Adrenal Cortex Hormones"[Mesh])           | ("Asthma"[Mesh] OR "Pulmonary Disease, Chronic Obstructive"[Mesh]) AND ("Glucocorticoids"[Mesh] OR "Adrenal Cortex Hormones"[Mesh]) AND (clinicaltrial[Filter] OR randomizedcontrolledtrial[Filter])           | ("Asthma"[Mesh] OR "Pulmonary Disease, Chronic Obstructive"[Mesh]) AND ("Glucocorticoids"[Mesh] OR "Adrenal Cortex Hormones"[Mesh]) AND (meta-analysis[Filter] OR systematicreview[Filter])           |
| 65 | Motion sickness, ginger, and psychophysics.                                                                                                                                             | ("Ginger"[Mesh] OR "Plant Extracts"[Mesh])                                                                                                    | ("Ginger"[Mesh] OR "Plant Extracts"[Mesh]) AND                                                                                                                                                                 | ("Ginger"[Mesh] OR "Plant Extracts"[Mesh]) AND (meta-                                                                                                                                                 |

|    |                                                                                                                                                                       |                                                                                                                                               |                                                                                                                                                                                                                |                                                                                                                                                                                                       |
|----|-----------------------------------------------------------------------------------------------------------------------------------------------------------------------|-----------------------------------------------------------------------------------------------------------------------------------------------|----------------------------------------------------------------------------------------------------------------------------------------------------------------------------------------------------------------|-------------------------------------------------------------------------------------------------------------------------------------------------------------------------------------------------------|
|    | <i>Lancet. 1982 Mar 20;1(8273):655-7.</i>                                                                                                                             |                                                                                                                                               | (clinicaltrial[Filter] OR randomizedcontrolledtrial[Filter])                                                                                                                                                   | analysis[Filter] OR systematicreview[Filter])                                                                                                                                                         |
| 66 | Nefopam for severe hiccups.<br><i>N Engl J Med. 2000 Dec 28;343(26):1973-4.</i>                                                                                       | "Hiccup"[Mesh]                                                                                                                                | "Hiccup"[Mesh] AND (clinicaltrial[Filter] OR randomizedcontrolledtrial[Filter])                                                                                                                                | "Hiccup"[Mesh] AND (meta-analysis[Filter] OR systematicreview[Filter])                                                                                                                                |
| 67 | Olive oil and reduced need for antihypertensive medications.<br><i>Arch Intern Med. 2000 Mar 27;160(6):837-42.</i>                                                    | "Olive Oil"[Mesh]                                                                                                                             | "Olive Oil"[Mesh] AND (clinicaltrial[Filter] OR randomizedcontrolledtrial[Filter])                                                                                                                             | "Olive Oil"[Mesh] AND (meta-analysis[Filter] OR systematicreview[Filter])                                                                                                                             |
| 68 | Ondansetron for reduction of drinking among biologically predisposed alcoholic patients: A randomized controlled trial.<br><i>JAMA. 2000 Aug 23-30;284(8):963-71.</i> | "Ondansetron"[Mesh]                                                                                                                           | "Ondansetron"[Mesh] AND (clinicaltrial[Filter] OR randomizedcontrolledtrial[Filter])                                                                                                                           | "Ondansetron"[Mesh] AND (meta-analysis[Filter] OR systematicreview[Filter])                                                                                                                           |
| 69 | Peginterferon alfa-2a in patients with chronic hepatitis C.<br><i>N Engl J Med. 2000 Dec 7;343(23):1666-72.</i>                                                       | "Hepatitis C, Chronic"[Mesh] AND ("Interferon alpha-2"[Mesh] OR "peginterferon alfa-2a" [Supplementary Concept] OR "peginterferon alfa-2a")   | "Hepatitis C, Chronic"[Mesh] AND ("Interferon alpha-2"[Mesh] OR "peginterferon alfa-2a" [Supplementary Concept] OR "peginterferon alfa-2a") AND (clinicaltrial[Filter] OR randomizedcontrolledtrial[Filter])   | "Hepatitis C, Chronic"[Mesh] AND ("Interferon alpha-2"[Mesh] OR "peginterferon alfa-2a" [Supplementary Concept] OR "peginterferon alfa-2a") AND (meta-analysis[Filter] OR systematicreview[Filter])   |
| 70 | Peginterferon alfa-2a in patients with chronic hepatitis C and cirrhosis.<br><i>N Engl J Med. 2000 Dec 7;343(23):1673-80.</i>                                         | ("Hepatitis C, Chronic"[Mesh] OR "Liver Cirrhosis"[Mesh]) AND ("peginterferon alfa-2a" [Supplementary Concept] OR "Interferon alpha-2"[Mesh]) | ("Hepatitis C, Chronic"[Mesh] OR "Liver Cirrhosis"[Mesh]) AND ("peginterferon alfa-2a" [Supplementary Concept] OR "Interferon alpha-2"[Mesh]) AND (clinicaltrial[Filter] OR randomizedcontrolledtrial[Filter]) | ("Hepatitis C, Chronic"[Mesh] OR "Liver Cirrhosis"[Mesh]) AND ("peginterferon alfa-2a" [Supplementary Concept] OR "Interferon alpha-2"[Mesh]) AND (meta-analysis[Filter] OR systematicreview[Filter]) |
| 71 | Physical activity and risk of stroke in women.<br><i>JAMA. 2000 Jun 14;283(22):2961-7.</i>                                                                            | "Exercise"[Mesh] AND "Stroke/prevention and control"[Mesh]                                                                                    | "Exercise"[Mesh] AND "Stroke/prevention and control"[Mesh] AND (clinicaltrial[Filter] OR randomizedcontrolledtrial[Filter])                                                                                    | "Exercise"[Mesh] AND "Stroke/prevention and control"[Mesh] AND (meta-analysis[Filter] OR systematicreview[Filter])                                                                                    |
| 72 | Pravastatin therapy and the risk of stroke.<br><i>N Engl J Med. 2000 Aug 3;343(5):317-26.</i>                                                                         | "Pravastatin"[Mesh] AND "Stroke"[Mesh]                                                                                                        | "Pravastatin"[Mesh] AND "Stroke"[Mesh] AND (clinicaltrial[Filter] OR randomizedcontrolledtrial[Filter])                                                                                                        | "Pravastatin"[Mesh] AND "Stroke"[Mesh] AND (meta-analysis[Filter] OR systematicreview[Filter])                                                                                                        |
| 73 | Prevention of hip fracture in elderly people with use of a hip protector.<br><i>N Engl J Med. 2000 Nov 23;343(21):1506-13.</i>                                        | Protector* AND "Hip Fractures/prevention and control"[Mesh]                                                                                   | Protector* AND "Hip Fractures/prevention and control"[Mesh] AND (clinicaltrial[Filter] OR randomizedcontrolledtrial[Filter])                                                                                   | Protector* AND "Hip Fractures/prevention and control"[Mesh] AND (meta-analysis[Filter] OR systematicreview[Filter])                                                                                   |

|    |                                                                                                                                                                                                       |                                                                                                                            |                                                                                                                                                                                             |                                                                                                                                                                                    |
|----|-------------------------------------------------------------------------------------------------------------------------------------------------------------------------------------------------------|----------------------------------------------------------------------------------------------------------------------------|---------------------------------------------------------------------------------------------------------------------------------------------------------------------------------------------|------------------------------------------------------------------------------------------------------------------------------------------------------------------------------------|
| 74 | Prevention of pulmonary embolism and deep vein thrombosis with low dose aspirin: Pulmonary Embolism Prevention (PEP) trial.<br><i>Lancet. 2000 Apr 15;355(9212):1295-302.</i>                         | "Aspirin"[Mesh] AND ("Pulmonary Embolism/prevention and control"[Mesh] OR "Thrombophlebitis/prevention and control"[Mesh]) | "Aspirin"[Mesh] AND ("Pulmonary Embolism/prevention and control"[Mesh] OR "Thrombophlebitis/prevention and control"[Mesh]) AND (clinicaltrial[Filter] OR randomizedcontrolledtrial[Filter]) | "Aspirin"[Mesh] AND ("Pulmonary Embolism/prevention and control"[Mesh] OR "Thrombophlebitis/prevention and control"[Mesh]) AND (meta-analysis[Filter] OR systematicreview[Filter]) |
| 75 | Prospective evaluation of Roux-en-Y gastric bypass as primary operation for medically complicated obesity.<br><i>Mayo Clin Proc. 2000 Jul;75(7):673-80.</i>                                           | "Obesity"[Mesh] AND ("Anastomosis, Roux-en-Y"[Mesh] OR "Gastric Bypass"[Mesh])                                             | "Obesity"[Mesh] AND ("Anastomosis, Roux-en-Y"[Mesh] OR "Gastric Bypass"[Mesh]) AND (clinicaltrial[Filter] OR randomizedcontrolledtrial[Filter])                                             | "Obesity"[Mesh] AND ("Anastomosis, Roux-en-Y"[Mesh] OR "Gastric Bypass"[Mesh]) AND (meta-analysis[Filter] OR systematicreview[Filter])                                             |
| 76 | Randomised controlled trial of homoeopathy versus placebo in perennial allergic rhinitis with overview of four trial series.<br><i>BMJ. 2000 Aug 19-26;321(7259):471-6.</i>                           | "Rhinitis, Allergic"[Mesh] AND "Homeopathy"[Mesh]                                                                          | "Rhinitis, Allergic"[Mesh] AND "Homeopathy"[Mesh] AND (clinicaltrial[Filter] OR randomizedcontrolledtrial[Filter])                                                                          | "Rhinitis, Allergic"[Mesh] AND "Homeopathy"[Mesh] AND (meta-analysis[Filter] OR systematicreview[Filter])                                                                          |
| 77 | Relationship of symptom-onset-to-balloon time and door-to-balloon time with mortality in patients undergoing angioplasty for acute myocardial infarction.<br><i>JAMA. 2000 Jun 14;283(22):2941-7.</i> | "Myocardial Infarction"[Mesh] AND Door-to-balloon                                                                          | "Myocardial Infarction"[Mesh] AND Door-to-balloon AND (clinicaltrial[Filter] OR randomizedcontrolledtrial[Filter])                                                                          | "Myocardial Infarction"[Mesh] AND Door-to-balloon AND (meta-analysis[Filter] OR systematicreview[Filter])                                                                          |
| 78 | Reversion of prion protein conformational changes by synthetic beta-sheet breaker peptides.<br><i>Lancet. 2000 Jan 15;355(9199):192-7.</i>                                                            | "Prion Diseases"[Mesh]                                                                                                     | "Prion Diseases"[Mesh] AND (clinicaltrial[Filter] OR randomizedcontrolledtrial[Filter])                                                                                                     | "Prion Diseases"[Mesh] AND (meta-analysis[Filter] OR systematicreview[Filter])                                                                                                     |
| 79 | Saw palmetto extracts for treatment of benign prostatic hyperplasia: a systematic review.<br><i>JAMA. 1998 Nov 11;280(18):1604-9.</i>                                                                 | "Prostatic Hyperplasia"[Mesh] AND "saw palmetto extract"<br>[Supplementary Concept]                                        | "Prostatic Hyperplasia"[Mesh] AND "saw palmetto extract"<br>[Supplementary Concept] AND (clinicaltrial[Filter] OR randomizedcontrolledtrial[Filter])                                        | "Prostatic Hyperplasia"[Mesh] AND "saw palmetto extract"<br>[Supplementary Concept] AND (meta-analysis[Filter] OR systematicreview[Filter])                                        |
| 80 | Siblings, day-care attendance, and the risk of asthma and wheezing during childhood.<br><i>N Engl J Med. 2000 Aug 24;343(8):538-43.</i>                                                               | ("Siblings"[Mesh] OR Siblings OR "Child Day Care Centers"[Mesh]) AND "Asthma"[Mesh]                                        | ("Siblings"[Mesh] OR Siblings OR "Child Day Care Centers"[Mesh]) AND "Asthma"[Mesh] AND (clinicaltrial[Filter] OR randomizedcontrolledtrial[Filter])                                        | ("Siblings"[Mesh] OR Siblings OR "Child Day Care Centers"[Mesh]) AND "Asthma"[Mesh] AND (meta-analysis[Filter] OR systematicreview[Filter])                                        |
| 81 | Smoking reduction with oral nicotine inhalers: double                                                                                                                                                 | ("Nicotine"[Mesh] AND "Administration, Inhalation"[Mesh])                                                                  | ("Nicotine"[Mesh] AND "Administration, Inhalation"[Mesh]) OR                                                                                                                                | ("Nicotine"[Mesh] AND "Administration, Inhalation"[Mesh]) OR                                                                                                                       |

|    |                                                                                                                                                                                |                                                                                                                                    |                                                                                                                                                                                                  |                                                                                                                                                                                         |
|----|--------------------------------------------------------------------------------------------------------------------------------------------------------------------------------|------------------------------------------------------------------------------------------------------------------------------------|--------------------------------------------------------------------------------------------------------------------------------------------------------------------------------------------------|-----------------------------------------------------------------------------------------------------------------------------------------------------------------------------------------|
|    | blind, randomised clinical trial of efficacy and safety.<br><i>BMJ. 2000 Aug 5;321(7257):329-33.</i>                                                                           | OR "nicotine inhaler"[Mesh] OR "Tobacco Use Cessation Devices"[Mesh] AND ("Smoking Cessation"[Mesh] OR "Smoking Prevention"[Mesh]) | "nicotine inhaler"[Mesh] OR "Tobacco Use Cessation Devices"[Mesh] AND ("Smoking Cessation"[Mesh] OR "Smoking Prevention"[Mesh]) AND (clinicaltrial[Filter] OR randomizedcontrolledtrial[Filter]) | "nicotine inhaler"[Mesh] OR "Tobacco Use Cessation Devices"[Mesh] AND ("Smoking Cessation"[Mesh] OR "Smoking Prevention"[Mesh]) AND (meta-analysis[Filter] OR systematicreview[Filter]) |
| 82 | Smoking, smoking cessation, and lung cancer in the UK since 1950: combination of national statistics with two case-control studies.<br><i>BMJ. 2000 Aug 5;321(7257):323-9.</i> | "Smoking Cessation"[Mesh] AND "Lung Neoplasms"[Mesh]                                                                               | "Smoking Cessation"[Mesh] AND "Lung Neoplasms"[Mesh] AND (clinicaltrial[Filter] OR randomizedcontrolledtrial[Filter])                                                                            | "Smoking Cessation"[Mesh] AND "Lung Neoplasms"[Mesh] AND (meta-analysis[Filter] OR systematicreview[Filter])                                                                            |
| 83 | St John's wort for depression: a systematic review.<br><i>Arch Intern Med. 2000 Jan 24;160(2):152-6.</i>                                                                       | "Depressive Disorder"[Mesh] AND "Hypericum"[Mesh]                                                                                  | "Depressive Disorder"[Mesh] AND "Hypericum"[Mesh] AND (clinicaltrial[Filter] OR randomizedcontrolledtrial[Filter])                                                                               | "Depressive Disorder"[Mesh] AND "Hypericum"[Mesh] AND (meta-analysis[Filter] OR systematicreview[Filter])                                                                               |
| 84 | Systematic review of water fluoridation.<br><i>BMJ. 2000 Oct 7;321(7265):855-9.</i>                                                                                            | "Fluoridation"[Mesh] AND "Dental Caries"[Mesh]                                                                                     | "Fluoridation"[Mesh] AND "Dental Caries"[Mesh] AND (clinicaltrial[Filter] OR randomizedcontrolledtrial[Filter])                                                                                  | "Fluoridation"[Mesh] AND "Dental Caries"[Mesh] AND (meta-analysis[Filter] OR systematicreview[Filter])                                                                                  |
| 85 | The effect of celecoxib, a cyclooxygenase-2 inhibitor, in familial adenomatous polyposis.<br><i>N Engl J Med. 2000 Jun 29;342(26):1946-52.</i>                                 | "Adenomatous Polyposis Coli"[Mesh] AND ("Celecoxib"[Mesh] OR "Cyclooxygenase 2 Inhibitors"[Mesh])                                  | "Adenomatous Polyposis Coli"[Mesh] AND ("Celecoxib"[Mesh] OR "Cyclooxygenase 2 Inhibitors"[Mesh]) AND (clinicaltrial[Filter] OR randomizedcontrolledtrial[Filter])                               | "Adenomatous Polyposis Coli"[Mesh] AND ("Celecoxib"[Mesh] OR "Cyclooxygenase 2 Inhibitors"[Mesh]) (meta-analysis[Filter] OR systematicreview[Filter])                                   |
| 86 | The effectiveness of vaccination against influenza in healthy, working adults.<br><i>N Engl J Med. 1995 Oct 5;333(14):889-93.</i>                                              | Healthy AND "Influenza Vaccines"[Mesh]                                                                                             | Healthy AND "Influenza Vaccines"[Mesh] AND (clinicaltrial[Filter] OR randomizedcontrolledtrial[Filter])                                                                                          | Healthy AND "Influenza Vaccines"[Mesh] AND (meta-analysis[Filter] OR systematicreview[Filter])                                                                                          |
| 87 | The impact of an antismoking media campaign on progression to established smoking: results of a longitudinal youth study.<br><i>Am J Public Health. 2000 Mar;90(3):380-6.</i>  | ("Television"[Mesh] OR "Mass Media"[Mesh]) AND ("Smoking Cessation"[Mesh] OR "Smoking Prevention"[Mesh])                           | ("Television"[Mesh] OR "Mass Media"[Mesh]) AND ("Smoking Cessation"[Mesh] OR "Smoking Prevention"[Mesh]) AND (clinicaltrial[Filter] OR randomizedcontrolledtrial[Filter])                        | ("Television"[Mesh] OR "Mass Media"[Mesh]) AND ("Smoking Cessation"[Mesh] OR "Smoking Prevention"[Mesh]) AND (meta-analysis[Filter] OR systematicreview[Filter])                        |
| 88 | The Krukenberg procedure: a surgical option for the treatment of double hand amputees in Sierra Leone.<br><i>Lancet. 2000 Sep 23;356(9235):1072-5.</i>                         | ("Amputation Stumps"[Mesh] OR "Amputees"[Mesh]) OR "Krukenberg procedure"                                                          | ("Amputation Stumps"[Mesh] OR "Amputees"[Mesh]) OR "Krukenberg procedure" AND (clinicaltrial[Filter] OR randomizedcontrolledtrial[Filter])                                                       | ("Amputation Stumps"[Mesh] OR "Amputees"[Mesh]) OR "Krukenberg procedure" AND (meta-analysis[Filter] OR systematicreview[Filter])                                                       |

|    |                                                                                                                                                                                                            |                                                                                                                                                                                                                  |                                                                                                                                                                                                                                                                                   |                                                                                                                                                                                                                                                                          |
|----|------------------------------------------------------------------------------------------------------------------------------------------------------------------------------------------------------------|------------------------------------------------------------------------------------------------------------------------------------------------------------------------------------------------------------------|-----------------------------------------------------------------------------------------------------------------------------------------------------------------------------------------------------------------------------------------------------------------------------------|--------------------------------------------------------------------------------------------------------------------------------------------------------------------------------------------------------------------------------------------------------------------------|
| 89 | The volume of primary angioplasty procedures and survival after acute myocardial infarction. National Registry of Myocardial Infarction 2 Investigators. <i>N Engl J Med.</i> 2000 May 25;342(21):1573-80. | ("Myocardial Infarction"[Mesh] OR "Angioplasty, Balloon, Coronary"[Mesh]) AND (volume OR "Health Facility Size"[Mesh]) AND "Hospital Mortality"[Mesh]                                                            | ("Myocardial Infarction"[Mesh] OR "Angioplasty, Balloon, Coronary"[Mesh]) AND (volume OR "Health Facility Size"[Mesh]) AND "Hospital Mortality"[Mesh] AND (clinicaltrial[Filter] OR randomizedcontrolledtrial[Filter])                                                            | ("Myocardial Infarction"[Mesh] OR "Angioplasty, Balloon, Coronary"[Mesh]) AND (volume OR "Health Facility Size"[Mesh]) AND "Hospital Mortality"[Mesh] AND (meta-analysis[Filter] OR systematicreview[Filter])                                                            |
| 90 | Transdermal testosterone treatment in women with impaired sexual function after oophorectomy. <i>N Engl J Med.</i> 2000 Sep 7;343(10):682-8.                                                               | ("Ovariectomy"[Mesh] OR "Postmenopause"[Mesh]) AND ("Testosterone"[Mesh] OR "Transdermal testosterone")                                                                                                          | ("Ovariectomy"[Mesh] OR "Postmenopause"[Mesh]) AND ("Testosterone"[Mesh] OR "Transdermal testosterone") AND (clinicaltrial[Filter] OR randomizedcontrolledtrial[Filter])                                                                                                          | ("Ovariectomy"[Mesh] OR "Postmenopause"[Mesh]) AND ("Testosterone"[Mesh] OR "Transdermal testosterone") AND (meta-analysis[Filter] OR systematicreview[Filter])                                                                                                          |
| 91 | Treatment of dysthymia and minor depression in primary care: A randomized controlled trial in older adults. <i>JAMA.</i> 2000 Sep 27;284(12):1519-26.                                                      | ("Depression"[Mesh] OR "Depressive Disorder"[Mesh] OR "Minor depression" OR "sub-threshold depression" OR "Dysthymic Disorder"[Mesh]) AND ("Antidepressive Agents"[Mesh] OR "Serotonin Uptake Inhibitors"[Mesh]) | ("Depression"[Mesh] OR "Depressive Disorder"[Mesh] OR "Minor depression" OR "sub-threshold depression" OR "Dysthymic Disorder"[Mesh]) AND ("Antidepressive Agents"[Mesh] OR "Serotonin Uptake Inhibitors"[Mesh]) AND (clinicaltrial[Filter] OR randomizedcontrolledtrial[Filter]) | ("Depression"[Mesh] OR "Depressive Disorder"[Mesh] OR "Minor depression" OR "sub-threshold depression" OR "Dysthymic Disorder"[Mesh]) AND ("Antidepressive Agents"[Mesh] OR "Serotonin Uptake Inhibitors"[Mesh]) AND (meta-analysis[Filter] OR systematicreview[Filter]) |
| 92 | Treatment of hypertension with ascorbic acid. <i>Lancet.</i> 1999 Dec 11;354(9195):2048-9.                                                                                                                 | "Hypertension"[Mesh] AND "Ascorbic Acid"[Mesh]                                                                                                                                                                   | "Hypertension"[Mesh] AND "Ascorbic Acid"[Mesh] AND (clinicaltrial[Filter] OR randomizedcontrolledtrial[Filter])                                                                                                                                                                   | "Hypertension"[Mesh] AND "Ascorbic Acid"[Mesh] AND (meta-analysis[Filter] OR systematicreview[Filter])                                                                                                                                                                   |
| 93 | Treatment of warfarin-associated coagulopathy with oral vitamin K: a randomised controlled trial. <i>Lancet.</i> 2000 Nov 4;356(9241):1551-3.                                                              | ("Blood Coagulation Disorders"[Mesh] OR "Warfarin/adverse effects"[Mesh] OR "warfarin-associated coagulopathy" OR "Anticoagulants"[Mesh]) AND ("Vitamin K"[Mesh] OR Phytonadione)                                | ("Blood Coagulation Disorders"[Mesh] OR "Warfarin/adverse effects"[Mesh] OR "warfarin-associated coagulopathy" OR "Anticoagulants"[Mesh]) AND ("Vitamin K"[Mesh] OR Phytonadione) AND (clinicaltrial[Filter] OR randomizedcontrolledtrial[Filter])                                | ("Blood Coagulation Disorders"[Mesh] OR "Warfarin/adverse effects"[Mesh] OR "warfarin-associated coagulopathy" OR "Anticoagulants"[Mesh]) AND ("Vitamin K"[Mesh] OR Phytonadione) AND (meta-analysis[Filter] OR systematicreview[Filter])                                |
| 94 | Trends in the incidence of coronary heart disease and changes in diet and lifestyle in women. <i>N Engl J Med.</i> 2000 Aug 24;343(8):530-7.                                                               | "Cardiovascular Diseases"[Mesh] AND ("Life Style"[Mesh] OR "Smoking"[Mesh] OR "Diet"[Mesh] OR "Postmenopause"[Mesh])                                                                                             | "Cardiovascular Diseases"[Mesh] AND ("Life Style"[Mesh] OR "Smoking"[Mesh] OR "Diet"[Mesh] OR "Postmenopause"[Mesh]) AND (clinicaltrial[Filter] OR randomizedcontrolledtrial[Filter])                                                                                             | "Cardiovascular Diseases"[Mesh] AND ("Life Style"[Mesh] OR "Smoking"[Mesh] OR "Diet"[Mesh] OR "Postmenopause"[Mesh]) AND (meta-analysis[Filter] OR systematicreview[Filter])                                                                                             |
| 95 | Triggering of sudden death from cardiac causes by vigorous exertion.                                                                                                                                       | ("Physical Exertion"[Mesh] OR "Exercise"[Mesh]) AND ("Coronary Disease/mortality"[Mesh] OR "Death, Sudden,                                                                                                       | ("Physical Exertion"[Mesh] OR "Exercise"[Mesh]) AND ("Coronary Disease/mortality"[Mesh] OR "Death, Sudden,                                                                                                                                                                        | ("Physical Exertion"[Mesh] OR "Exercise"[Mesh]) AND ("Coronary Disease/mortality"[Mesh] OR "Death, Sudden,                                                                                                                                                               |

|     |                                                                                                                                                                  |                                                                                                                                                                         |                                                                                                                                                                                                                                          |                                                                                                                                                                                                                                 |
|-----|------------------------------------------------------------------------------------------------------------------------------------------------------------------|-------------------------------------------------------------------------------------------------------------------------------------------------------------------------|------------------------------------------------------------------------------------------------------------------------------------------------------------------------------------------------------------------------------------------|---------------------------------------------------------------------------------------------------------------------------------------------------------------------------------------------------------------------------------|
|     | <i>N Engl J Med.</i> 2000 Nov 9;343(19):1355-61.                                                                                                                 | Cardiac"[Mesh])                                                                                                                                                         | Cardiac"[Mesh]) AND (clinicaltrial[Filter] OR randomizedcontrolledtrial[Filter])                                                                                                                                                         | Cardiac"[Mesh]) AND (meta-analysis[Filter] OR systematicreview[Filter])                                                                                                                                                         |
| 96  | Type of alcohol consumed and mortality from all causes, coronary heart disease, and cancer.<br><i>Ann Intern Med.</i> 2000 Sep 19;133(6):411-9.                  | ("Alcohol Drinking"[Mesh] OR "Wine"[Mesh] OR Wine* OR "Beer"[Mesh] OR Beer*) AND ("Cardiovascular Diseases"[Mesh] OR "Neoplasms"[Mesh])                                 | ("Alcohol Drinking"[Mesh] OR "Wine"[Mesh] OR Wine* OR "Beer"[Mesh] OR Beer*) AND ("Cardiovascular Diseases"[Mesh] OR "Neoplasms"[Mesh]) AND (clinicaltrial[Filter] OR randomizedcontrolledtrial[Filter])                                 | ("Alcohol Drinking"[Mesh] OR "Wine"[Mesh] OR Wine* OR "Beer"[Mesh] OR Beer*) AND ("Cardiovascular Diseases"[Mesh] OR "Neoplasms"[Mesh]) AND (meta-analysis[Filter] OR systematicreview[Filter])                                 |
| 97  | Use of automated external defibrillators by a U.S. airline.<br><i>N Engl J Med.</i> 2000 Oct 26;343(17):1210-6.                                                  | ("Aircraft"[Mesh] OR "Out-of-Hospital Cardiac Arrest"[Mesh]) AND ("Electric Stimulation Therapy"[Mesh] OR "Defibrillators"[Mesh] OR "Emergency Medical Services"[Mesh]) | ("Aircraft"[Mesh] OR "Out-of-Hospital Cardiac Arrest"[Mesh]) AND ("Electric Stimulation Therapy"[Mesh] OR "Defibrillators"[Mesh] OR "Emergency Medical Services"[Mesh]) AND (clinicaltrial[Filter] OR randomizedcontrolledtrial[Filter]) | ("Aircraft"[Mesh] OR "Out-of-Hospital Cardiac Arrest"[Mesh]) AND ("Electric Stimulation Therapy"[Mesh] OR "Defibrillators"[Mesh] OR "Emergency Medical Services"[Mesh]) AND (meta-analysis[Filter] OR systematicreview[Filter]) |
| 98  | Vaginal misoprostol administered 1, 2, or 3 days after mifepristone for early medical abortion: A randomized trial.<br><i>JAMA.</i> 2000 Oct 18;284(15):1948-53. | "Abortion, Induced"[Mesh] AND ("Misoprostol"[Mesh] AND "Mifepristone"[Mesh])                                                                                            | "Abortion, Induced"[Mesh] AND ("Misoprostol"[Mesh] AND "Mifepristone"[Mesh]) AND (clinicaltrial[Filter] OR randomizedcontrolledtrial[Filter])                                                                                            | "Abortion, Induced"[Mesh] AND ("Misoprostol"[Mesh] AND "Mifepristone"[Mesh]) AND (meta-analysis[Filter] OR systematicreview[Filter])                                                                                            |
| 99  | Vitamin E consumption and the risk of coronary disease in women.<br><i>N Engl J Med.</i> 1993 May 20;328(20):1444-9.                                             | "Cardiovascular Diseases"[Mesh] AND ("Vitamin E"[Mesh] OR "Antioxidants"[Mesh] OR "Dietary Supplements"[Mesh])                                                          | "Cardiovascular Diseases"[Mesh] AND ("Vitamin E"[Mesh] OR "Antioxidants"[Mesh] OR "Dietary Supplements"[Mesh]) AND (clinicaltrial[Filter] OR randomizedcontrolledtrial[Filter])                                                          | "Cardiovascular Diseases"[Mesh] AND ("Vitamin E"[Mesh] OR "Antioxidants"[Mesh] OR "Dietary Supplements"[Mesh]) AND (meta-analysis[Filter] OR systematicreview[Filter])                                                          |
| 100 | Yoga-based intervention for carpal tunnel syndrome: a randomized trial.<br><i>JAMA.</i> 1998 Nov 11;280(18):1601-3.                                              | ("Carpal Tunnel Syndrome"[Mesh] OR "Pain"[Mesh]) AND "Yoga"[Mesh]                                                                                                       | ("Carpal Tunnel Syndrome"[Mesh] OR "Pain"[Mesh]) AND "Yoga"[Mesh] AND (clinicaltrial[Filter] OR randomizedcontrolledtrial[Filter])                                                                                                       | ("Carpal Tunnel Syndrome"[Mesh] OR "Pain"[Mesh]) AND "Yoga"[Mesh] AND (meta-analysis[Filter] OR systematicreview[Filter])                                                                                                       |
