# Supplementary material for: Twenty-year follow-up of promising clinical studies reported in highly circulated newspapers: a meta-epidemiological study
Source: HighWire-hosted journal article supplement (doi:10.1136/bmjhci-2023-100768), 2023-06-01
Supplement: bmjhci-2023-100768supp003_data_supplement.pdf [file bmjhci-2023-100768supp003_data_supplement.pdf]

eTable 3. Details of the original and subsequent studies

| No. | Original study                                                                                                                                                                                             |        |                                                               |                                   |                                                                                   |                                             |                                      |       | Subsequent study                                                                                                                                                                                                      |                   |                                                        | Comparison of original and subsequent studies   |                                                                              |
|-----|------------------------------------------------------------------------------------------------------------------------------------------------------------------------------------------------------------|--------|---------------------------------------------------------------|-----------------------------------|-----------------------------------------------------------------------------------|---------------------------------------------|--------------------------------------|-------|-----------------------------------------------------------------------------------------------------------------------------------------------------------------------------------------------------------------------|-------------------|--------------------------------------------------------|-------------------------------------------------|------------------------------------------------------------------------------|
|     | Title                                                                                                                                                                                                      | Design | Newspaper story in the year 2000                              | Participant                       | Intervention or exposure                                                          | Comparison                                  | Outcome                              | ICD10 | Title                                                                                                                                                                                                                 | Design            | Outcome                                                | “Unchallenged” or “Confirmed” or “Contradicted” | “Replicated” or “Initially stronger effects”                                 |
| 1   | A comparison of etanercept and methotrexate in patients with early rheumatoid arthritis.<br><i>N Engl J Med. 2000 Nov 30;343(22):1586-93.</i>                                                              | RCT    | Washington Post (November 30)<br>Washington Post (December 5) | Early Rheumatoid arthritis        | Etanercept                                                                        | Methotrexate                                | Response (ACR-20)                    | M08   | Different Original and Biosimilar TNF Inhibitors Similarly Reduce Joint Destruction in Rheumatoid Arthritis-A Network Meta-Analysis of 36 Randomized Controlled Trials.<br><i>Int J Mol Sci. 2019;20(18).</i>         | SR and MA of RCTs | Percentage of the annual radiographic progression rate | Confirmed                                       | -                                                                            |
| 2   | A comparison of glyburide and insulin in women with gestational diabetes mellitus.<br><i>N Engl J Med. 2000 Oct 19;343(16):1134-8.</i>                                                                     | RCT    | Washington Post (October 31)                                  | Gestational diabetes mellitus     | Glyburide                                                                         | Insulin                                     | Glycemic control                     | O24   | Glycemic control and neonatal outcomes in women with gestational diabetes mellitus treated using glyburide, metformin, or insulin: a pairwise and network meta-analysis.<br><i>BMC Endocr Disord. 2021;21(1):199.</i> | SR and MA of RCTs | Fasting blood glucose                                  | Confirmed                                       | Replicated<br>- Original: SMD=0.18<br>- Subsequent: SMD=0.15 (-0.03 to 0.33) |
| 3   | A comparison of inhaled fluticasone and oral prednisone for children with severe acute asthma.<br><i>N Engl J Med. 2000 Sep 7;343(10):689-94.</i>                                                          | RCT    | Washington Post (September 7)                                 | Children with severe acute asthma | Inhaled fluticasone                                                               | Oral prednisone                             | Change in FEV <sub>1</sub>           | J45   | Inhaled Corticosteroids in Acute Asthma: A Systemic Review and Meta-Analysis.<br><i>J Allergy Clin Immunol Pract. 2020;8(2):605-17.e6.</i>                                                                            | SR and MA of RCTs | Admission to hospital                                  | Contradicted                                    | -                                                                            |
| 4   | A comparison of levomethadyl acetate, buprenorphine, and methadone for opioid dependence.<br><i>N Engl J Med. 2000 Nov 2;343(18):1290-7.</i>                                                               | RCT    | Washington Post (November 2)                                  | Opioid dependence                 | High dose methadone                                                               | Low dose methadone                          | Continued participation in the study | F11   | A meta-analysis of retention in methadone maintenance by dose and dosing strategy.<br><i>Am J Drug Alcohol Abuse. 2009;35(1):28-33.</i>                                                                               | SR and MA of RCTs | Adjusted retention rate                                | Confirmed                                       | -                                                                            |
| 5   | A comparison of nefazodone, the cognitive behavioral-analysis system of psychotherapy, and their combination for the treatment of chronic depression.<br><i>N Engl J Med. 2000 May 18;342(20):1462-70.</i> | RCT    | New York Times (May 18)                                       | Chronic depression                | Nefazodone + Psychotherapy                                                        | 1) Nefazodone only<br>2) Psychotherapy only | Hamilton depression rating scale     | F33   | None                                                                                                                                                                                                                  | -                 | -                                                      | Unchallenged                                    | -                                                                            |
| 6   | A controlled trial of sustained-release bupropion, a nicotine patch, or both for smoking cessation.<br><i>N Engl J Med. 1999 Mar 4;340(9):685-91.</i>                                                      | RCT    | Daily Mirror (June 27)                                        | Smoker                            | 1) Sustained-release bupropion<br>2) Sustained-release bupropion + nicotine patch | Placebo                                     | Abstinence                           | Z72   | The effect of Varenicline and Bupropion on smoking cessation: A network meta-analysis of 20 randomized controlled trials.<br><i>Addict Behav. 2022;131:107329.</i>                                                    | SR and MA of RCTs | Number of people who quit smoking                      | Confirmed                                       | -                                                                            |
| 7   | A five-year study of the incidence of dyskinesia in patients with early Parkinson's disease who were treated with ropinirole or levodopa.<br><i>N Engl J Med. 2000 May 18;342(20):1484-91.</i>             | RCT    | Washington Post (May 23)                                      | Early Parkinson's disease         | Ropinirole                                                                        | Levodopa                                    | Incidence of dyskinesia              | G20   | None                                                                                                                                                                                                                  | -                 | -                                                      | Unchallenged                                    | -                                                                            |

|    |                                                                                                                                                                                                         |     |                                                                                                                   |                    |                                                  |                                                |                                                  |             |                                                                                                                                                                                         |                    |                       |              |                                                                                           |
|----|---------------------------------------------------------------------------------------------------------------------------------------------------------------------------------------------------------|-----|-------------------------------------------------------------------------------------------------------------------|--------------------|--------------------------------------------------|------------------------------------------------|--------------------------------------------------|-------------|-----------------------------------------------------------------------------------------------------------------------------------------------------------------------------------------|--------------------|-----------------------|--------------|-------------------------------------------------------------------------------------------|
| 8  | A placebo-controlled, double-blind, randomized trial of an extract of Ginkgo biloba for dementia. North American EGb Study Group. <i>JAMA. 1997 Oct 22-29;278(16):1327-32.</i>                          | RCT | New York Times (March 7)                                                                                          | Dementia           | Ginkgo Biloba                                    | Placebo                                        | ADAS-Cog                                         | F03         | Ginkgo Biloba for Mild Cognitive Impairment and Alzheimer's Disease: A Systematic Review and Meta-Analysis of Randomized Controlled Trials. <i>Curr Top Med Chem. 2016;16(5):520-8.</i> | SR and MA of RCTs  | Cognitive function    | Contradicted | -                                                                                         |
| 9  | A preliminary study of growth hormone therapy for Crohn's disease. <i>N Engl J Med. 2000 Jun 1;342(22):1633-7.</i>                                                                                      | RCT | New York Times (June 1)<br>New York Times (August 15)<br>Washington Post (June 1)<br>Washington Post (June 6)     | Crohn's disease    | Growth hormone                                   | Placebo                                        | Crohn's Disease Activity Index                   | K50         | None                                                                                                                                                                                    | -                  | -                     | Unchallenged | -                                                                                         |
| 10 | A prolonged outbreak of Pseudomonas aeruginosa in a neonatal intensive care unit: did staff fingernails play a role in disease transmission? <i>Infect Control Hosp Epidemiol. 2000 Feb;21(2):80-5.</i> | OS  | Daily News (March 24)                                                                                             | Staff in NICU      | Long nails or use of long artificial fingernails | Short nails                                    | Incidence of infection of Pseudomonas Aeruginosa | A49         | None                                                                                                                                                                                    | -                  | -                     | Unchallenged | -                                                                                         |
| 11 | A prospective study of coffee consumption and the risk of symptomatic gallstone disease in men. <i>JAMA. 1999 Jun 9;281(22):2106-12.</i>                                                                | OS  | Daily Mail (August 1)                                                                                             | Men                | More than two cups of coffee                     | No intake                                      | Gallstone disease                                | Z72         | Systematic review with meta-analysis: coffee consumption and the risk of gallstone disease. <i>Aliment Pharmacol Ther. 2015;42(6):637-48.</i>                                           | SR and MA of OSs   | Gallstone disease     | Confirmed    | Replicated<br>- Original: RR=0.81<br>- Subsequent: RR=0.83 (0.78 to 0.89)                 |
| 12 | A prospective study of diet quality and mortality in women. <i>JAMA. 2000 Apr 26;283(16):2109-15.</i>                                                                                                   | OS  | Washington Post (April 26)<br>Daily Mail (April 27)<br>Daily Mirror (April 26)                                    | Women              | Current dietary guidelines                       | Stratified by Recommended Food Score           | All-cause mortality                              | Z72         | Evaluation of Dietary Patterns and All-Cause Mortality: A Systematic Review. <i>JAMA Netw Open. 2021;4(8):e2122277.</i>                                                                 | SR of OSs          | All-cause mortality   | Confirmed    | -                                                                                         |
| 13 | A randomized controlled trial of auricular acupuncture for cocaine dependence. <i>Arch Intern Med. 2000 Aug 14-28;160(15):2305-12.</i>                                                                  | RCT | New York Times (August 15)<br>Washington Post (August 14)<br>Washington Post (August 22)<br>USA Today (August 14) | Cocaine addiction  | Acupuncture                                      | 1) Needle insertion<br>2) No-needle relaxation | Cocaine negative urine                           | F14         | Acupuncture therapy for drug addiction. <i>Chin Med. 2016;11:16.</i>                                                                                                                    | SR of RCTs and OSs | Narrative description | Contradicted | -                                                                                         |
| 14 | A randomized, controlled trial of the effects of remote, intercessory prayer on outcomes in patients admitted to the coronary care unit. <i>Arch Intern Med. 1999 Oct 25;159(19):2273-8.</i>            | RCT | USA Today (July 18)                                                                                               | CCU patients       | Intercessory prayer                              | Usual care                                     | MAHI-CCU score                                   | unspecified | The Effect of Prayer on Patients' Health: Systematic Literature Review. <i>Religions. 2016;7(1).</i>                                                                                    | SR of RCTs         | Narrative description | Confirmed    | -                                                                                         |
| 15 | All-cause mortality associated with physical activity during leisure time, work, sports, and cycling to work. <i>Arch Intern Med. 2000 Jun 12;160(11):1621-8.</i>                                       | OS  | Daily Mirror (July 9)                                                                                             | General population | Leisure time physical activity                   | Sedentary                                      | All-cause mortality                              | Z72         | Protective Effect on Mortality of Active Commuting to Work: A Systematic Review and Meta-analysis. <i>Sports Med. 2020;50(12):2237-50.</i>                                              | SR and MA of OSs   | All-cause mortality   | Confirmed    | Initially stronger effects<br>- Original: HR=0.72<br>- Subsequent: HR=0.91 (0.85 to 0.97) |
| 16 | Anti-digoxin Fab fragments in cardiotoxicity induced by ingestion of yellow oleander: a randomised controlled trial. <i>Lancet. 2000 Mar 18;355(9208):967-72.</i>                                       | RCT | Daily Mail (April 2)                                                                                              | Cardiac arrhythmia | Anti-digoxin Fab                                 | Placebo                                        | ECG                                              | I49         | None                                                                                                                                                                                    | -                  | -                     | Unchallenged | -                                                                                         |

|    |                                                                                                                                                                                                                                   |     |                                                    |                               |                                          |                                                   |                                                       |     |                                                                                                                                                                                                                                                                                                             |                           |                                        |              |                                                                             |
|----|-----------------------------------------------------------------------------------------------------------------------------------------------------------------------------------------------------------------------------------|-----|----------------------------------------------------|-------------------------------|------------------------------------------|---------------------------------------------------|-------------------------------------------------------|-----|-------------------------------------------------------------------------------------------------------------------------------------------------------------------------------------------------------------------------------------------------------------------------------------------------------------|---------------------------|----------------------------------------|--------------|-----------------------------------------------------------------------------|
| 17 | Antitumor activity of thalidomide in refractory multiple myeloma.<br><i>N Engl J Med.</i> 1999 Nov 18;341(21):1565-71.                                                                                                            | OS  | New York Times (May 22)<br>Washington Post (May 5) | Refractory myeloma            | Thalidomide                              | No comparison                                     | Decline in the level of paraprotein in serum or urine | C90 | A systematic review of phase-II trials of thalidomide monotherapy in patients with relapsed or refractory multiple myeloma.<br><i>Br J Haematol.</i> 2006;132(5):584-93.                                                                                                                                    | SR of OSs                 | Narrative description                  | Confirmed    | -                                                                           |
| 18 | Association of the California Tobacco Control Program with declines in cigarette consumption and mortality from heart disease.<br><i>N Engl J Med.</i> 2000 Dec 14;343(24):1772-7.                                                | OS  | New York Times (December 14)                       | General population            | Tobacco Control Program                  | No program                                        | Mortality from heart disease                          | Z72 | Legislative smoking bans for reducing harms from secondhand smoke exposure, smoking prevalence and tobacco consumption.<br><i>Cochrane Database Syst Rev.</i> 2016;2(2):Cd005992.                                                                                                                           | SR of RCTs and OSs        | Narrative description                  | Confirmed    | -                                                                           |
| 19 | Attendance at cultural events, reading books or periodicals, and making music or singing in a choir as determinants for survival: Swedish interview survey of living conditions.<br><i>BMJ.</i> 1996 Dec 21-28;313(7072):1577-80. | OS  | Daily Telegraph (December 2)                       | General population            | Attendance at cultural events<br>"often" | Attendance at cultural events<br>"rarely"         | Survival                                              | Z72 | Social relationships and mortality risk: a meta-analytic review.<br><i>PLoS Med.</i> 2010;7(7):e1000316.                                                                                                                                                                                                    | SR and MA of OSs          | Survival                               | Confirmed    | Replicated<br>- Original: SMD=0.23<br>- Subsequent: SMD=0.25 (0.21 to 0.29) |
| 20 | Cardiopulmonary resuscitation by chest compression alone or with mouth-to-mouth ventilation.<br><i>N Engl J Med.</i> 2000 May 25;342(21):1546-53.                                                                                 | RCT | Washington Post (May 25)                           | Cardiopulmonary resuscitation | Chest compression alone                  | Chest compression with mouth-to-mouth ventilation | Survival to hospital discharge                        | I46 | Current evidence of survival benefit between chest-compression only versus standard cardiopulmonary resuscitation in out-of-hospital cardiac arrest : Updated systematic review and meta-analysis of randomized controlled trials with trial sequential analysis.<br><i>Herz.</i> 2021;46(Suppl 2):198-208. | SR and MA of RCTs         | Survival to hospital discharge         | Confirmed    | Replicated<br>- Original: SMD=0.21<br>- Subsequent: SMD=0.12 (0.01 to 0.24) |
| 21 | Cognitive decline in women in relation to non-protein-bound oestradiol concentrations.<br><i>Lancet.</i> 2000 Aug 26;356(9231):708-12.                                                                                            | OS  | Daily Mail (August 25)                             | Older women                   | High oestrogens                          | Low oestrogens                                    | Cognitive impairment                                  | F03 | Blood-based biomarkers in hypothalamic-pituitary axes for the risk of dementia or cognitive decline: a systematic review and meta-analysis.<br><i>Aging (Albany NY).</i> 2020;12(20):20350-65.                                                                                                              | SR and MA of OSs          | Risk of dementia and cognitive decline | Contradicted | -                                                                           |
| 22 | Community water fluoridation, bone mineral density, and fractures: prospective study of effects in older women.<br><i>BMJ.</i> 2000 Oct 7;321(7265):860-4.                                                                        | OS  | Daily Mail (October 6)                             | Older women                   | Water fluoridation                       | No exposure                                       | Hip fractures                                         | M80 | Exposure to fluoride in drinking water and hip fracture risk: a meta-analysis of observational studies.<br><i>PLoS One.</i> 2015;10(5):e0126488.                                                                                                                                                            | SR and MA of OSs          | Hip fractures                          | Contradicted | -                                                                           |
| 23 | Comparison of leg compression stocking and oral horse-chestnut seed extract therapy in patients with chronic venous insufficiency.<br><i>Lancet.</i> 1996 Feb 3;347(8997):292-4.                                                  | RCT | Daily Mail (December 26)                           | Chronic venous insufficiency  | Horse chestnut seed extract              | Placebo                                           | Logarithmically transformed volume data               | I87 | None                                                                                                                                                                                                                                                                                                        | -                         | -                                      | Unchallenged | -                                                                           |
| 24 | Comparison of lifestyle and structured interventions to increase physical activity and cardiorespiratory fitness: a randomized trial.<br><i>JAMA.</i> 1999 Jan 27;281(4):327-34.                                                  | RCT | Washington Post (January 11)                       | Sedentary men and women       | Lifestyle physical activity program      | Traditional structured exercise                   | Energy expenditure                                    | Z72 | Effectiveness of Structured Physical Activity Interventions Through the Evaluation of Physical Activity Levels, Adoption, Retention, Maintenance, and Adherence Rates: A Systematic Review and Meta-Analysis.                                                                                               | SR and MA of RCTs and OSs | Physical activity level                | Confirmed    | -                                                                           |

|    |                                                                                                                                                                                                                                      |                    |                                                                                                                 |                          |                                                      |                                                      |                                                |     |                                                                                                                                                                                                                                    |                    |                         |              |                                                                                             |
|----|--------------------------------------------------------------------------------------------------------------------------------------------------------------------------------------------------------------------------------------|--------------------|-----------------------------------------------------------------------------------------------------------------|--------------------------|------------------------------------------------------|------------------------------------------------------|------------------------------------------------|-----|------------------------------------------------------------------------------------------------------------------------------------------------------------------------------------------------------------------------------------|--------------------|-------------------------|--------------|---------------------------------------------------------------------------------------------|
|    |                                                                                                                                                                                                                                      |                    |                                                                                                                 |                          |                                                      |                                                      |                                                |     | <i>J Phys Act Health. 2021;18(1):116-29.</i>                                                                                                                                                                                       |                    |                         |              |                                                                                             |
| 25 | Comparison of St John's wort and imipramine for treating depression: randomised controlled trial.<br><i>BMJ. 2000 Sep 2;321(7260):536-9.</i>                                                                                         | RCT                | USA Today (September 5)<br>Daily Mail (September 1)<br>Daily Mirror (September 1)<br>Daily Mirror (September 2) | Depression               | Hypericum                                            | Imipramine                                           | Hamilton depression rating scale               | F32 | A systematic review of St. John's wort for major depressive disorder.<br><i>Syst Rev. 2016;5(1):148.</i>                                                                                                                           | SR and MA of RCTs  | Responder rate          | Confirmed    | Replicated<br>- Original: RR=1.08<br>- Subsequent: RR=1.01 (0.90 to 1.14)                   |
| 26 | Comparison of wet combing with malathion for treatment of head lice in the UK: a pragmatic randomised controlled trial.<br><i>Lancet. 2000 Aug 12;356(9229):540-4.</i>                                                               | RCT                | Times (August 24)<br>Daily Mail (September 5)<br>Daily Mirror (September 7)                                     | Head lice                | Malathion                                            | Bug-busting (wet combing with a fine-toothed comb)   | Presence of live lice                          | B85 | Single blind, randomised, comparative study of the Bug Buster kit and over the counter pediculicide treatments against head lice in the United Kingdom.<br><i>Bmj. 2005;331(7513):384-7.</i>                                       | RCT                | Cure rate               | Contradicted | -                                                                                           |
| 27 | Dexamethasone alone or in combination with ondansetron for the prevention of delayed nausea and vomiting induced by chemotherapy. The Italian Group for Antiemetic Research.<br><i>N Engl J Med. 2000 May 25;342(21):1554-9.</i>     | RCT                | Washington Post (May 30)                                                                                        | Chemotherapy             | Dexamethasone or dexamethasone plus ondansetron      | Placebo                                              | Delayed vomiting and moderate-to-severe nausea | R11 | None                                                                                                                                                                                                                               | -                  | -                       | Unchallenged | -                                                                                           |
| 28 | Directly observed therapy for treatment completion of pulmonary tuberculosis: Consensus Statement of the Public Health Tuberculosis Guidelines Panel.<br><i>JAMA. 1998 Mar 25;279(12):943-8.</i>                                     | SR of RCTs and OSs | USA Today (October 16)                                                                                          | Pulmonary tuberculosis   | Directly observed therapy                            | Standard care                                        | Treatment completion                           | A15 | Interventions to improve adherence to tuberculosis treatment: systematic review and meta-analysis.<br><i>Int J Tuberc Lung Dis. 2018;22(7):731-40.</i>                                                                             | SR and MA of RCTs  | Cure rate               | Confirmed    | -                                                                                           |
| 29 | Efavirenz plus zidovudine and lamivudine, efavirenz plus indinavir, and indinavir plus zidovudine and lamivudine in the treatment of HIV-1 infection in adults. Study 006 Team.<br><i>N Engl J Med. 1999 Dec 16;341(25):1865-73.</i> | RCT                | USA Today (October 16)                                                                                          | HIV-1 infection          | Combination of efavirenz, zidovudine, and lamivudine | Combination of indinavir, zidovudine, and lamivudine | Suppression of plasma HIV-1 RNA                | B24 | Initial highly-active antiretroviral therapy with a protease inhibitor versus a non-nucleoside reverse transcriptase inhibitor: discrepancies between direct and indirect meta-analyses.<br><i>Lancet. 2006;368(9546):1503-15.</i> | SR and MA of RCTs  | Virological suppression | Confirmed    | Initially stronger effects<br>- Original: SMD=0.47<br>- Subsequent: SMD=0.26 (0.15 to 0.37) |
| 30 | Effect of a surgical training programme on outcome of rectal cancer in the County of Stockholm. Stockholm Colorectal Cancer Study Group, Basingstoke Bowel Cancer Research Project.<br><i>Lancet. 2000 Jul 8;356(9224):93-6.</i>     | OS                 | Times (July 7)                                                                                                  | Rectal cancer            | Surgical training programme                          | Historical controls                                  | Recurrence prevention                          | C18 | Systematic review of quality improvement interventions directed at cancer specialists.<br><i>J Clin Oncol. 2013;31(12):1583-91.</i>                                                                                                | SR of RCTs and OSs | Narrative description   | Contradicted | -                                                                                           |
| 31 | Effect of breastfeeding and formula feeding on transmission of HIV-1: a randomized clinical trial.<br><i>JAMA. 2000 Mar 1;283(9):1167-74.</i>                                                                                        | RCT                | Daily News (March 1)                                                                                            | HIV-1 seropositive women | Breast milk substitutes                              | Breastfeeding                                        | Infant HIV-1 infection                         | B24 | Interventions for preventing late postnatal mother-to-child transmission of HIV.<br><i>Cochrane Database Syst Rev. 2009;2009(1):Cd006734.</i>                                                                                      | SR of RCTs         | Narrative description   | Confirmed    | -                                                                                           |

|    |                                                                                                                                                                                                                             |     |                                                       |                         |                                      |                           |                                                                      |     |                                                                                                                                                                  |                    |                       |              |                                                                             |
|----|-----------------------------------------------------------------------------------------------------------------------------------------------------------------------------------------------------------------------------|-----|-------------------------------------------------------|-------------------------|--------------------------------------|---------------------------|----------------------------------------------------------------------|-----|------------------------------------------------------------------------------------------------------------------------------------------------------------------|--------------------|-----------------------|--------------|-----------------------------------------------------------------------------|
| 32 | Effect of decreasing afferent vagal activity with ondansetron on symptoms of bulimia nervosa: a randomised, double-blind trial.<br><i>Lancet. 2000 Mar 4;355(9206):792-7.</i>                                               | RCT | Washington Post (March 14)<br>Daily Mail (March 3)    | Bulimia nervosa         | Ondansetron                          | Placebo                   | Number of binge/vomit episodes                                       | F50 | None                                                                                                                                                             | -                  | -                     | Unchallenged | -                                                                           |
| 33 | Effect of exercise on coronary endothelial function in patients with coronary artery disease.<br><i>N Engl J Med. 2000 Feb 17;342(7):454-60.</i>                                                                            | RCT | Washington Post (February 22)                         | Coronary artery disease | Exercise                             | Treatment as usual        | Response to acetylcholine                                            | I25 | None                                                                                                                                                             | -                  | -                     | Unchallenged | -                                                                           |
| 34 | Effect of lung-volume-reduction surgery in patients with severe emphysema.<br><i>N Engl J Med. 2000 Jul 27;343(4):239-45.</i>                                                                                               | RCT | Washington Post (July 27)                             | Emphysema               | Lung-volume-reduction surgery        | Medication                | Changes in FEV1                                                      | J43 | Surgical and endoscopic interventions that reduce lung volume for emphysema: a systemic review and meta-analysis.<br><i>Lancet Respir Med. 2019;7(4):313-24.</i> | SR and MA of RCTs  | Mortality             | Confirmed    | -                                                                           |
| 35 | Effectiveness of a hospital-wide programme to improve compliance with hand hygiene. Infection Control Programme.<br><i>Lancet. 2000 Oct 14;356(9238):1307-12.</i>                                                           | OS  | Daily Mirror (October 13)                             | Hospital staff          | Hand hygiene campaign                | No comparison             | Compliance with hand hygiene                                         | A49 | Interventions to improve hand hygiene compliance in patient care.<br><i>Cochrane Database Syst Rev. 2017;9(9):Cd005186.</i>                                      | SR of RCTs and OSs | Narrative description | Confirmed    | -                                                                           |
| 36 | Effectiveness of manual physical therapy and exercise in osteoarthritis of the knee. A randomized, controlled trial.<br><i>Ann Intern Med. 2000 Feb 1;132(3):173-81.</i>                                                    | RCT | Washington Post (February 8)                          | Osteoarthritis          | Manual physical therapy and exercise | Subtherapeutic ultrasound | Western Ontario and McMaster Universities Osteoarthritis Index score | M19 | The Efficacy of Manual Therapy in Patients with Knee Osteoarthritis: A Systematic Review.<br><i>Medicina (Kaunas). 2021;57(7).</i>                               | SR of RCTs         |                       | Confirmed    |                                                                             |
| 37 | Effects of selenium supplementation for cancer prevention in patients with carcinoma of the skin. A randomized controlled trial. Nutritional Prevention of Cancer Study Group.<br><i>JAMA. 1996 Dec 25;276(24):1957-63.</i> | RCT | Daily Mail (September 12)<br>Daily Mail (December 19) | Skin carcinoma          | Selenium supplementation             | Placebo                   | Incidence of basal and squamous cell carcinomas of skin              | C44 | -                                                                                                                                                                | -                  | -                     | *            | -                                                                           |
| 38 | Efficacy and safety of acetaminophen in the treatment of migraine: results of a randomized, double-blind, placebo-controlled, population-based study.<br><i>Arch Intern Med. 2000 Dec 11-25;160(22):3486-92.</i>            | RCT | Washington Post (December 19)                         | Migraine                | Acetaminophen                        | Placebo                   | Headache response                                                    | G43 | Paracetamol (acetaminophen) with or without an antiemetic for acute migraine headaches in adults.<br><i>Cochrane Database Syst Rev. 2013;2013(4):Cd008040.</i>   | SR and MA of RCTs  | Pain-free at 2 hours  | Confirmed    | Replicated<br>- Original: SMD=0.45<br>- Subsequent: SMD=0.38 (0.13 to 0.64) |
| 39 | Efficacy and safety of sertraline treatment of posttraumatic stress disorder: a randomized controlled trial.<br><i>JAMA. 2000 Apr 12;283(14):1837-44.</i>                                                                   | RCT | Washington Post (April 18)                            | PTSD                    | Sertraline                           | Placebo                   | CAPS-2 total severity score                                          | F43 | Pharmacotherapy for post traumatic stress disorder (PTSD).<br><i>Cochrane Database Syst Rev. 2022;3(3):Cd002795.</i>                                             | SR and MA of RCTs  | CGI-I responder       | Confirmed    | Replicated<br>- Original: SMD=0.26<br>- Subsequent: SMD=0.27 (0.15 to 0.40) |

|    |                                                                                                                                                                                                                                                                        |                   |                                                                                                              |                                                           |                                       |                          |                                       |     |                                                                                                                                                                                      |                           |                                              |              |   |
|----|------------------------------------------------------------------------------------------------------------------------------------------------------------------------------------------------------------------------------------------------------------------------|-------------------|--------------------------------------------------------------------------------------------------------------|-----------------------------------------------------------|---------------------------------------|--------------------------|---------------------------------------|-----|--------------------------------------------------------------------------------------------------------------------------------------------------------------------------------------|---------------------------|----------------------------------------------|--------------|---|
| 40 | Efficacy of selective serotonin-reuptake inhibitors in premenstrual syndrome: a systematic review.<br><i>Lancet. 2000 Sep 30;356(9236):1131-6.</i>                                                                                                                     | SR and MA of RCTs | Washington Post (October 17)<br>Times (October 12)<br>Daily Mail (September 29)<br>Daily Mail (September 29) | Premenstrual syndrome                                     | SSRI                                  | Placebo                  | Reduction in overall PMS symptoms     | N94 | Selective serotonin reuptake inhibitors for premenstrual syndrome.<br><i>Cochrane Database Syst Rev. 2013;2013(6):Cd001396.</i>                                                      | SR and MA of RCTs         | All symptoms (end scores)                    | Confirmed    |   |
| 41 | Efficacy of voluntary HIV-1 counselling and testing in individuals and couples in Kenya, Tanzania, and Trinidad: a randomised trial. The Voluntary HIV-1 Counseling and Testing Efficacy Study Group.<br><i>Lancet. 2000 Jul 8;356(9224):103-12.</i>                   | RCT               | Daily Mail (July 10)                                                                                         | Individual or couple patients in Kenya                    | HIV voluntary counselling and testing | Basic health information | Unprotected intercourse               | B24 | Systematic review of couple-based HIV intervention and prevention studies: advantages, gaps, and future directions.<br><i>AIDS Behav. 2014;18(10):1864-87.</i>                       | SR of RCTs and OSs        | Narrative description                        | Confirmed    | - |
| 42 | Enduring effects of nurse home visitation on maternal life course: a 3-year follow-up of a randomized trial.<br><i>JAMA. 2000 Apr 19;283(15):1983-9.</i>                                                                                                               | RCT               | Washington Post (May 2)                                                                                      | Pregnant women with sociodemographic risk factors         | Home visitation of nurse              | Assessment only          | Subsequent pregnancy                  | Z35 | None                                                                                                                                                                                 | -                         | -                                            | Unchallenged | - |
| 43 | Etanercept in children with polyarticular juvenile rheumatoid arthritis. Pediatric Rheumatology Collaborative Study Group.<br><i>N Engl J Med. 2000 Mar 16;342(11):763-9.</i>                                                                                          | RCT               | Washington Post (March 16)                                                                                   | Children with polyarticular juvenile rheumatoid arthritis | Etanercept                            | Placebo                  | Number of patients with disease flare | M08 | The benefit-risk balance for biological agents in juvenile idiopathic arthritis: a meta-analysis of randomized clinical trials.<br><i>Rheumatology (Oxford). 2020;59(9):2226-36.</i> | SR and MA of RCTs         | Relapse                                      | Confirmed    | - |
| 44 | Exercise and weight loss reduce blood pressure in men and women with mild hypertension: effects on cardiovascular, metabolic, and hemodynamic functioning.<br><i>Arch Intern Med. 2000 Jul 10;160(13):1947-58.</i>                                                     | RCT               | Washington Post (July 18)                                                                                    | Mild hypertension                                         | Aerobic exercise                      | Waiting list             | Blood pressure                        | I10 | Meta-Analysis of the Effect of Aerobic Training on Blood Pressure in Hypertensive Patients.<br><i>Comput Math Methods Med. 2022;2022:9281661.</i>                                    | SR and MA of RCTs and OSs | Blood pressure                               | Confirmed    | - |
| 45 | Folic acid antagonists during pregnancy and the risk of birth defects.<br><i>N Engl J Med. 2000 Nov 30;343(22):1608-14.</i>                                                                                                                                            | OS                | USA Today (November 30)                                                                                      | Pregnant women                                            | Folic acid component of multivitamins | No comparison            | Cardiovascular defects of infants     | Z35 | Maternal folic acid supplementation and the risk of congenital heart defects in offspring: a meta-analysis of epidemiological observational studies.<br><i>Sci Rep. 2015;5:8506.</i> | SR and MA of OSs          | Risk of congenital heart defects             | Confirmed    | - |
| 46 | Gastrointestinal toxicity with celecoxib vs nonsteroidal anti-inflammatory drugs for osteoarthritis and rheumatoid arthritis: the CLASS study: A randomized controlled trial. Celecoxib Long-term Arthritis Safety Study.<br><i>JAMA. 2000 Sep 13;284(10):1247-55.</i> | RCT               | Washington Post (September 19)                                                                               | Osteoarthritis                                            | Celecoxib                             | NSAIDs                   | Symptomatic upper GI ulcers           | K25 | Celecoxib for osteoarthritis.<br><i>Cochrane Database Syst Rev. 2017;5(5):Cd009865.</i>                                                                                              | SR and MA of RCTs         | Number experiencing gastro-intestinal events | Contradicted | - |
|    |                                                                                                                                                                                                                                                                        |                   |                                                                                                              | Rheumatoid arthritis                                      |                                       |                          | Symptomatic upper GI ulcers           |     | Celecoxib for rheumatoid arthritis.<br><i>Cochrane Database Syst Rev. 2017;6(6):Cd012095.</i>                                                                                        | SR and MA of RCTs         | Incidence of gastroduodenal ulcers ≥ 3mm     | Confirmed    | - |

|    |                                                                                                                                                                                              |                         |                                                                               |                                                 |                                                |                                           |                                                                         |                       |                                                                                                                                                                                                        |                                    |                                                                                                    |              |                                                                                            |
|----|----------------------------------------------------------------------------------------------------------------------------------------------------------------------------------------------|-------------------------|-------------------------------------------------------------------------------|-------------------------------------------------|------------------------------------------------|-------------------------------------------|-------------------------------------------------------------------------|-----------------------|--------------------------------------------------------------------------------------------------------------------------------------------------------------------------------------------------------|------------------------------------|----------------------------------------------------------------------------------------------------|--------------|--------------------------------------------------------------------------------------------|
| 47 | Glucosamine and chondroitin for treatment of osteoarthritis: a systematic quality assessment and meta-analysis.<br><i>JAMA. 2000 Mar 15;283(11):1469-75.</i>                                 | SR and<br>MA of<br>RCTs | Washington Post (March 21)<br>Washington Post (May 16)<br>Daily News (June 4) | Osteoarthritis                                  | Glucosamine,<br>Chondroitin                    | Placebo                                   | Treatment effect<br>defined in each<br>primary study                    | M19                   | The Efficacy and Safety of Disease-Modifying Osteoarthritis Drugs for Knee and Hip<br>Osteoarthritis-a Systematic Review and Network<br>Meta-Analysis.<br><i>J Gen Intern Med. 2021;36(7):2085-93.</i> | SR and<br>MA of<br>RCTs            | Treatment effect<br>defined in each<br>primary study                                               | Confirmed    | -                                                                                          |
| 48 | Group B streptococcal disease in the era of intrapartum antibiotic prophylaxis.<br><i>N Engl J Med. 2000 Jan 6;342(1):15-20.</i>                                                             | OS                      | USA Today (January 6)                                                         | Pregnant women                                  | Prophylactic<br>intrapartum<br>antibiotics     | Historical controls                       | Group B<br>streptococcal<br>disease in<br>newborn (less<br>than 7 days) | Z35                   | Intrapartum antibiotics for known maternal Group B streptococcal colonization.<br><i>Cochrane Database Syst Rev. 2014(6):Cd007467.</i>                                                                 | SR and<br>MA of<br>RCTs            | Early (postnatal<br>age less than 7<br>days) Group B<br>streptococcal<br>infection in a<br>neonate | Confirmed    | -                                                                                          |
| 49 | HMG-CoA reductase inhibitors and the risk of fractures.<br><i>JAMA. 2000 Jun 28;283(24):3205-10.</i>                                                                                         | OS                      | Washington Post (June 28)<br>Washington Post (July 4)                         | General population<br>aged at least 50<br>years | HMG-CoA<br>reductase<br>inhibitors             | No use                                    | Fractures                                                               | S_<br>unspecifi<br>ed | Effects of Statins on Relative Risk of Fractures for Older Adults: An Updated Systematic Review With<br>Meta-Analysis.<br><i>J Am Med Dir Assoc. 2019;20(12):1566-78.e3.</i>                           | SR and<br>MA of<br>RCTs and<br>OSs | Risk of fracture                                                                                   | Contradicted | -                                                                                          |
| 50 | Homicide and suicide rates associated with implementation of the Brady Handgun Violence Prevention Act.<br><i>JAMA. 2000 Aug 2;284(5):585-91.</i>                                            | OS                      | USA Today (August 2)                                                          | General population                              | Brady Handgun<br>Violence<br>Prevention Act    | No comparison                             | Homicide and<br>suicide                                                 | T14                   | -                                                                                                                                                                                                      | -                                  | -                                                                                                  | *            | -                                                                                          |
| 51 | Hypericum extract versus imipramine or placebo in patients with moderate depression: randomised multicentre study of treatment for eight weeks.<br><i>BMJ. 1999 Dec 11;319(7224):1534-8.</i> | RCT                     | Times (January 27)<br>Daily Mirror (January 4)                                | Depression                                      | Hypericum                                      | Placebo                                   | Hamilton<br>depression rating<br>scale                                  | F32                   | A systematic review of St. John's wort for major depressive disorder.<br><i>Syst Rev. 2016;5(1):148.</i>                                                                                               | SR and<br>MA of<br>RCTs            | Depression scale<br>score at 4 weeks<br>or larger                                                  | Confirmed    | Replicated<br>- Original: RR=1.40<br>- Subsequent: RR=1.53 (1.19 to 1.97)                  |
| 52 | Immunologic and virologic effects of subcutaneous interleukin 2 in combination with antiretroviral therapy: A randomized controlled trial.<br><i>JAMA. 2000 Jul 12;284(2):183-9.</i>         | RCT                     | Daily News (July 8)                                                           | HIV                                             | Interleukin 2 and<br>antiretroviral<br>therapy | Antiretroviral<br>therapy alone           | CD4 cell count                                                          | B24                   | Interleukin-2 as an adjunct to antiretroviral therapy for HIV-positive adults.<br><i>Cochrane Database Syst Rev. 2017;5(5):Cd009818.</i>                                                               | SR and<br>MA of<br>RCTs            | CD4 cell count<br>and mortality                                                                    | Contradicted | -                                                                                          |
| 53 | Impact of zanamivir on antibiotic use for respiratory events following acute influenza in adolescents and adults.<br><i>Arch Intern Med. 2000 Nov 27;160(21):3234-40.</i>                    | SR and<br>MA of<br>RCTs | Washington Post (December 12)                                                 | Acute influenza in<br>adolescents and<br>adults | Zanamivir                                      | Placebo                                   | Respiratory<br>events leading to<br>antibiotic<br>prescriptions         | J10                   | Effectiveness and safety of neuraminidase inhibitors in reducing influenza complications: a meta-analysis of randomized controlled trials.<br><i>J Antimicrob Chemother. 2010;65(7):1330-46.</i>       | SR and<br>MA of<br>RCTs            | Additional<br>antibiotic<br>treatment                                                              | Contradicted | -                                                                                          |
| 54 | Incidence of cancer after prophylaxis with warfarin against recurrent venous thromboembolism. Duration of Anticoagulation Trial.                                                             | RCT                     | Washington Post (June 29)<br>Washington Post (July 18)                        | Venous<br>thromboembolism                       | Vitamin K<br>antagonists for six<br>months     | Vitamin K<br>antagonists for six<br>weeks | Incidence of<br>cancer                                                  | I74                   | Long-Term Vitamin K Antagonists and Cancer Risk: A Systematic Review and Meta-Analysis.<br><i>Am J Clin Oncol. 2019;42(9):717-24.</i>                                                                  | SR and<br>MA of<br>RCTs and<br>OSs | Incidence of<br>cancer                                                                             | Confirmed    | Initially stronger effects<br>- Original: HR=0.60<br>- Subsequent: SMD=0.81 (0.67 to 0.97) |

|                                                   |                                                                                                                              |             |                                                                                                                             |                              |                                                          |                          |                           |                       |                                                                                                                                                                                                                            |                           |                                     |              |                                                                             |
|---------------------------------------------------|------------------------------------------------------------------------------------------------------------------------------|-------------|-----------------------------------------------------------------------------------------------------------------------------|------------------------------|----------------------------------------------------------|--------------------------|---------------------------|-----------------------|----------------------------------------------------------------------------------------------------------------------------------------------------------------------------------------------------------------------------|---------------------------|-------------------------------------|--------------|-----------------------------------------------------------------------------|
| <i>N Engl J Med. 2000 Jun 29;342(26):1953-8.</i>  |                                                                                                                              |             |                                                                                                                             |                              |                                                          |                          |                           |                       |                                                                                                                                                                                                                            |                           |                                     |              |                                                                             |
| 55                                                | Influenza vaccination and the risk of primary cardiac arrest.                                                                | OS          | Times (October 9)                                                                                                           | General population           | Influenza vaccination                                    | No influenza vaccination | Primary cardiac arrest    | I46                   | Association of Influenza Vaccination With Cardiovascular Risk: A Meta-analysis.                                                                                                                                            | SR and MA of RCTs         | Major Adverse Cardiovascular Events | Confirmed    | -                                                                           |
| <i>Am J Epidemiol. 2000 Oct 1;152(7):674-7.</i>   |                                                                                                                              |             |                                                                                                                             |                              |                                                          |                          |                           |                       |                                                                                                                                                                                                                            |                           |                                     |              |                                                                             |
| 56                                                | Inhaled zanamivir for the prevention of influenza in families. Zanamivir Family Study Group.                                 | RCT         | New York Times (November 7)                                                                                                 | Influenza in families        | Inhaled zanamivir                                        | Placebo                  | Household protection      | J10                   | Use of neuraminidase inhibitors for rapid containment of influenza: a systematic review and meta-analysis of individual and household transmission studies.                                                                | SR and MA of RCTs and OSs | Household protection                | Confirmed    | Replicated<br>- Original: SMD=0.95<br>- Subsequent: SMD=0.95 (0.65 to 1.27) |
| <i>N Engl J Med. 2000 Nov 2;343(18):1282-9.</i>   |                                                                                                                              |             |                                                                                                                             |                              |                                                          |                          |                           |                       |                                                                                                                                                                                                                            |                           |                                     |              |                                                                             |
| 57                                                | Inhibitors of hydroxymethylglutaryl-coenzyme A reductase and risk of fracture among older women.                             | OS          | Washington Post (June 28)<br>Washington Post (July 4)<br>Daily News (June 23)                                               | Older women                  | Inhibitors of hydroxymethylglutaryl-coenzyme A reductase | No dispensing            | Fracture                  | S_<br>unspecifi<br>ed | Effects of Statins on Relative Risk of Fractures for Older Adults: An Updated Systematic Review With Meta-Analysis.                                                                                                        | SR and MA of RCTs and OSs | Fracture                            | Contradicted | -                                                                           |
| <i>Lancet. 2000 Jun 24;355(9222):2185-8.</i>      |                                                                                                                              |             |                                                                                                                             |                              |                                                          |                          |                           |                       |                                                                                                                                                                                                                            |                           |                                     |              |                                                                             |
| 58                                                | Irinotecan plus fluorouracil and leucovorin for metastatic colorectal cancer. Irinotecan Study Group.                        | RCT         | New York Times (September 26)<br>Washington Post (September 28)<br>Washington Post (October 3)<br>Daily News (September 28) | Metastatic colorectal cancer | Irinotecan plus fluorouracil and leucovorin              | Irinotecan               | Overall survival          | C18                   | Irinotecan chemotherapy combined with fluoropyrimidines versus irinotecan alone for overall survival and progression-free survival in patients with advanced and/or metastatic colorectal cancer.                          | SR and MA of RCTs         | Overall survival                    | Contradicted | -                                                                           |
| <i>N Engl J Med. 2000 Sep 28;343(13):905-14.</i>  |                                                                                                                              |             |                                                                                                                             |                              |                                                          |                          |                           |                       |                                                                                                                                                                                                                            |                           |                                     |              |                                                                             |
| 59                                                | Islet transplantation in seven patients with type 1 diabetes mellitus using a glucocorticoid-free immunosuppressive regimen. | Case series | New York Times (May 27)<br>New York Times (June 25)<br>New York Times (August 25)<br>Washington Post (June 13)              | Type 1 diabetes mellitus     | Islet transplantation                                    | No comparison            | Glycemic Control          | E10                   | Islet transplantation versus insulin therapy in patients with type 1 diabetes with severe hypoglycaemia or poorly controlled glycaemia after kidney transplantation (TRIMECO): a multicentre, randomised controlled trial. | RCT                       | Modified $\beta$ -score             | Confirmed    | -                                                                           |
| <i>N Engl J Med. 2000 Jul 27;343(4):230-8.</i>    |                                                                                                                              |             |                                                                                                                             |                              |                                                          |                          |                           |                       |                                                                                                                                                                                                                            |                           |                                     |              |                                                                             |
| 60                                                | Lamivudine as initial treatment for chronic hepatitis B in the United States.                                                | RCT         | Washington Post (February 6)                                                                                                | Chronic hepatitis B          | Lamivudine                                               | Placebo                  | Histologic Activity Index | B16                   | A comparative network meta-analysis of standard of care treatments in treatment-naïve chronic hepatitis B patients.                                                                                                        | SR and MA of RCTs         | HBeAg seroconversion                | Confirmed    | -                                                                           |
| <i>N Engl J Med. 1999 Oct 21;341(17):1256-63.</i> |                                                                                                                              |             |                                                                                                                             |                              |                                                          |                          |                           |                       |                                                                                                                                                                                                                            |                           |                                     |              |                                                                             |
| <i>J Comp Eff Res. 2020;9(15):1051-65.</i>        |                                                                                                                              |             |                                                                                                                             |                              |                                                          |                          |                           |                       |                                                                                                                                                                                                                            |                           |                                     |              |                                                                             |



|    |                                                                                                                                                                                     |             |                                                                                       |                                   |                         |                       |                             |     |                                                                                                                                                                                                         |                           |                       |              |   |
|----|-------------------------------------------------------------------------------------------------------------------------------------------------------------------------------------|-------------|---------------------------------------------------------------------------------------|-----------------------------------|-------------------------|-----------------------|-----------------------------|-----|---------------------------------------------------------------------------------------------------------------------------------------------------------------------------------------------------------|---------------------------|-----------------------|--------------|---|
| 61 | Lipid concentrations and the use of lipid lowering drugs: evidence from a national cross sectional survey.<br><i>BMJ. 2000 Nov 25;321(7272):1322-5.</i>                             | OS          | Times (November 24)<br>Daily Mail (November 24)                                       | General population                | Lipid lowering drugs    | No comparison         | Lipid concentrations        | E78 | -                                                                                                                                                                                                       | -                         | -                     | *            | - |
| 62 | Long-term effects of budesonide or nedocromil in children with asthma. The Childhood Asthma Management Program Research Group.<br><i>N Engl J Med. 2000 Oct 12;343(15):1054-63.</i> | RCT         | New York Times (October 24)<br>Washington Post (October 31)                           | Children with asthma              | Budesonide              | Placebo               | FEV <sub>1</sub>            | J45 | -                                                                                                                                                                                                       | -                         | -                     | *            | - |
| 63 | Low cardiorespiratory fitness and physical inactivity as predictors of mortality in men with type 2 diabetes.<br><i>Ann Intern Med. 2000 Apr 18;132(8):605-11.</i>                  | OS          | New York Times (May 23)<br>Washington Post (May 9)                                    | Men with type 2 diabetes mellitus | Physical active         | Physically inactive   | Mortality                   | E11 | None                                                                                                                                                                                                    | -                         | -                     | Unchallenged | - |
| 64 | Low-dose inhaled corticosteroids and the prevention of death from asthma.<br><i>N Engl J Med. 2000 Aug 3;343(5):332-6.</i>                                                          | OS          | New York Times (August 3)<br>Washington Post (August 3)<br>Washington Post (August 8) | Asthma                            | Inhaled corticosteroids | Nonuse                | Mortality                   | J45 | None                                                                                                                                                                                                    | -                         | -                     | Unchallenged | - |
| 65 | Motion sickness, ginger, and psychophysics.<br><i>Lancet. 1982 Mar 20;1(8273):655-7.</i>                                                                                            | RCT         | Daily Mirror (November 12)                                                            | Motion sickness                   | Zingiber officinale     | Placebo               | Gastrointestinal sensations | T75 | A. Ginger in gastrointestinal disorders: A systematic review of clinical trials.<br><i>Food Sci Nutr. 2019;7(1):96-108.</i>                                                                             | SR of RCTs                | Narrative description | Confirmed    | - |
| 66 | Nefopam for severe hiccups.<br><i>N Engl J Med. 2000 Dec 28;343(26):1973-4.</i>                                                                                                     | Case series | Daily Mail (December 29)                                                              | Hiccups                           | Nefopam                 | No comparison         | Hiccups stop                | R06 | Pharmacologic Interventions for Intractable and Persistent Hiccups: A Systematic Review.<br><i>J Emerg Med. 2017;53(4):540-9.</i>                                                                       | SR of RCTs and OSs        | Narrative description | Confirmed    | - |
| 67 | Olive oil and reduced need for antihypertensive medications.<br><i>Arch Intern Med. 2000 Mar 27;160(6):837-42.</i>                                                                  | RCT         | Washington Post (April 4)                                                             | Hypertension                      | Olive oil               | Sunflower oil         | Blood pressure              | I10 | Beneficial effects of dietary supplementation with olive oil, oleic acid, or hydroxytyrosol in metabolic syndrome: Systematic review and meta-analysis.<br><i>Free Radic Biol Med. 2021;172:372-85.</i> | SR and MA of RCTs and OSs | Blood pressure        | Contradicted | - |
| 68 | Ondansetron for reduction of drinking among biologically predisposed alcoholic patients: A randomized controlled trial.<br><i>JAMA. 2000 Aug 23-30;284(8):963-71.</i>               | RCT         | Washington Post (August 23)<br>Washington Post (August 29)<br>Daily News (August 23)  | Alcoholism                        | Ondansetron             | Placebo               | Drink per day               | F10 | Emerging pharmacotherapies for alcohol dependence: a systematic review focusing on reduction in consumption.<br><i>Drug Alcohol Depend. 2013;133(1):15-29.</i>                                          | SR of RCTs and OSs        | Narrative description | Confirmed    | - |
| 69 | Peginterferon alfa-2a in patients with chronic hepatitis C.<br><i>N Engl J Med. 2000 Dec 7;343(23):1666-72.</i>                                                                     | RCT         | Washington Post (December 7)                                                          | Chronic hepatitis C               | Peginterferon alfa-2a   | Interferon alfa-2a    | Virologic response          | B18 | Systematic review: peginterferon vs. standard interferon in the treatment of chronic hepatitis C.<br><i>Aliment Pharmacol Ther. 2003;18(7):661-70.</i>                                                  | SR of RCTs                | Narrative description | Confirmed    | - |
| 70 | Peginterferon alfa-2a in patients with chronic hepatitis C and cirrhosis.<br><i>N Engl J Med. 2000 Dec 7;343(23):1673-80.</i>                                                       | RCT         | Washington Post (December 7)                                                          | Chronic hepatitis C and cirrhosis | Peginterferon alfa-2a   | Interferon alfa-2a    | Virologic response          | B18 | Systematic review: peginterferon vs. standard interferon in the treatment of chronic hepatitis C.<br><i>Aliment Pharmacol Ther. 2003;18(7):661-70.</i>                                                  | SR of RCTs                | Narrative description | Confirmed    | - |
| 71 | Physical activity and risk of stroke in women.<br><i>JAMA. 2000 Jun 14;283(22):2961-7.</i>                                                                                          | OS          | Washington Post (June 14)<br>Washington Post (June 20)<br>Daily Mail (June 15)        | Women                             | Physical activity       | Low physical activity | Stroke                      | Z72 | Sex Differences in Physical Activity and Incident Stroke: A Systematic Review.<br><i>Clin Ther. 2022;44(4):586-611.</i>                                                                                 | SR of OSs                 | Narrative description | Confirmed    | - |

|    |                                                                                                                                                                                                       |                      |                                                                                        |                                          |                                  |                                           |                                             |     |                                                                                                                                                                                                                                                                                                             |                   |                                                           |              |                                                                             |
|----|-------------------------------------------------------------------------------------------------------------------------------------------------------------------------------------------------------|----------------------|----------------------------------------------------------------------------------------|------------------------------------------|----------------------------------|-------------------------------------------|---------------------------------------------|-----|-------------------------------------------------------------------------------------------------------------------------------------------------------------------------------------------------------------------------------------------------------------------------------------------------------------|-------------------|-----------------------------------------------------------|--------------|-----------------------------------------------------------------------------|
| 72 | Pravastatin therapy and the risk of stroke.<br><i>N Engl J Med.</i> 2000 Aug 3;343(5):317-26.                                                                                                         | RCT                  | New York Times (December 23)<br>Washington Post (August 8)                             | Myocardial infarction or unstable angina | Pravastatin                      | Placebo                                   | Stroke                                      | I21 | Comparison of statins for secondary prevention in patients with ischemic stroke or transient ischemic attack: a systematic review and network meta-analysis.<br><i>BMC Med.</i> 2019;17(1):67.                                                                                                              | SR and MA of RCTs | Cardiovascular event                                      | Contradicted | -                                                                           |
| 73 | Prevention of hip fracture in elderly people with use of a hip protector.<br><i>N Engl J Med.</i> 2000 Nov 23;343(21):1506-13.                                                                        | RCT                  | Washington Post (November 24)<br>Washington Post (November 28)                         | Elderly people                           | Hip protector                    | No use                                    | Hip fracture                                | S32 | Hip protectors for preventing hip fractures in older people.<br><i>Cochrane Database Syst Rev.</i> 2014(3):Cd001255.                                                                                                                                                                                        | SR and MA of RCTs | Hip fracture                                              | Contradicted | -                                                                           |
| 74 | Prevention of pulmonary embolism and deep vein thrombosis with low dose aspirin: Pulmonary Embolism Prevention (PEP) trial.<br><i>Lancet.</i> 2000 Apr 15;355(9212):1295-302.                         | RCT                  | Daily Telegraph (November 18)<br>Daily Telegraph (December 9)<br>Daily Mail (April 14) | Hip fracture and elective arthroplasty   | Low dose aspirin                 | Placebo                                   | Venous thrombo-embolism                     | I82 | None                                                                                                                                                                                                                                                                                                        | -                 | -                                                         | Unchallenged | -                                                                           |
| 75 | Prospective evaluation of Roux-en-Y gastric bypass as primary operation for medically complicated obesity.<br><i>Mayo Clin Proc.</i> 2000 Jul;75(7):673-80.                                           | OS                   | Washington Post (August 22)                                                            | Obesity                                  | Roux-en-Y Gastric Bypass         | No comparison                             | Body weight                                 | E66 | Surgery for weight loss in adults.<br><i>Cochrane Database Syst Rev.</i> 2014;2014(8):Cd003641.                                                                                                                                                                                                             | SR and MA of RCTs | Mean weight                                               | Confirmed    | -                                                                           |
| 76 | Randomised controlled trial of homoeopathy versus placebo in perennial allergic rhinitis with overview of four trial series.<br><i>BMJ.</i> 2000 Aug 19-26;321(7259):471-6.                           | Trial series of RCTs | Daily Mail (August 18)                                                                 | Allergic rhinitis                        | Homoeopathy                      | Placebo                                   | Nasal inspiratory peak flow                 | J30 | Homeopathy for Allergic Rhinitis: A Systematic Review.<br><i>J Altern Complement Med.</i> 2017;23(6):426-44.                                                                                                                                                                                                | SR and MA of RCTs | Nasal symptom relief                                      | Confirmed    | -                                                                           |
| 77 | Relationship of symptom-onset-to-balloon time and door-to-balloon time with mortality in patients undergoing angioplasty for acute myocardial infarction.<br><i>JAMA.</i> 2000 Jun 14;283(22):2941-7. | OS                   | New York Times (June 20)                                                               | Acute myocardial infarction              | Minimizing door-to-balloon times | Door-to-balloon times longer than 2 hours | In-hospital mortality                       | I21 | Coronary intervention door-to-balloon time and outcomes in ST-elevation myocardial infarction: a meta-analysis.<br><i>Heart.</i> 2018;104(16):1362-9.                                                                                                                                                       | SR and MA of OSs  | Myocardial infarction with ST-segment elevation mortality | Confirmed    | Replicated<br>- Original: SMD=0.14<br>- Subsequent: SMD=0.18 (0.10 to 0.27) |
| 78 | Reversion of prion protein conformational changes by synthetic beta-sheet breaker peptides.<br><i>Lancet.</i> 2000 Jan 15;355(9199):192-7.                                                            | Laboratory study     | Times (January 14)<br>Times (May 11)<br>Daily Mail (January 14)                        | Prion-related disorders                  | Beta-sheet breaker peptides      | No comparison                             | Delayed the appearance of clinical symptoms | A81 | None                                                                                                                                                                                                                                                                                                        | -                 | -                                                         | Unchallenged | -                                                                           |
| 79 | Saw palmetto extracts for treatment of benign prostatic hyperplasia: a systematic review.<br><i>JAMA.</i> 1998 Nov 11;280(18):1604-9.                                                                 | SR and MA of RCTs    | Daily News (September 25)                                                              | Benign prostatic hyperplasia             | Saw palmetto extracts            | Placebo                                   | Urologic symptom scale                      | N40 | Clinical Efficacy of <i>Serenoa repens</i> Versus Placebo Versus Alpha-blockers for the Treatment of Lower Urinary Tract Symptoms/Benign Prostatic Enlargement: A Systematic Review and Network Meta-analysis of Randomized Placebo-controlled Clinical Trials.<br><i>Eur Urol Focus.</i> 2021;7(2):420-31. | SR and MA of RCTs | International Prostate Symptom Score                      | Contradicted | -                                                                           |

|    |                                                                                                                                                                                |                     |                                                                                    |                                |                                      |                                    |                                                      |     |                                                                                                                                                                               |                           |                                          |              |                                                                             |
|----|--------------------------------------------------------------------------------------------------------------------------------------------------------------------------------|---------------------|------------------------------------------------------------------------------------|--------------------------------|--------------------------------------|------------------------------------|------------------------------------------------------|-----|-------------------------------------------------------------------------------------------------------------------------------------------------------------------------------|---------------------------|------------------------------------------|--------------|-----------------------------------------------------------------------------|
| 80 | Siblings, day-care attendance, and the risk of asthma and wheezing during childhood.<br><i>N Engl J Med.</i> 2000 Aug 24;343(8):538-43.                                        | OS                  | New York Times (August 31)<br>Washington Post (August 29)<br>USA Today (August 24) | Young children                 | Exposure to older children           | One or no siblings and no day care | Asthma                                               | J45 | Day-care center attendance and risk of Asthma-A systematic review.<br><i>Allergol Immunopathol (Madr).</i> 2018;46(6):578-84.                                                 | SR and MA of OSs          | Risk of asthma                           | Contradicted | -                                                                           |
| 81 | Smoking reduction with oral nicotine inhalers: double blind, randomised clinical trial of efficacy and safety.<br><i>BMJ.</i> 2000 Aug 5;321(7257):329-33.                     | RCT                 | Washington Post (August 22)                                                        | Smoker                         | Oral nicotine inhaler                | Placebo inhaler                    | Smoking reduction                                    | Z72 | Smoking cessation medicines and e-cigarettes: a systematic review, network meta-analysis and cost-effectiveness analysis.<br><i>Health Technol Assess.</i> 2021;25(59):1-224. | SR and MA of RCTs and OSs | Sustained abstinence                     | Confirmed    | -                                                                           |
| 82 | Smoking, smoking cessation, and lung cancer in the UK since 1950: combination of national statistics with two case-control studies.<br><i>BMJ.</i> 2000 Aug 5;321(7257):323-9. | Trial series Of OSs | Washington Post (August 3)<br>Daily Mail (August 3)<br>Daily Mirror (August 3)     | Smoker                         | Smoking cessation                    | Smoking                            | Lung cancer prevalence                               | C34 | Lifetime Smoking History and Risk of Lung Cancer: Results From the Framingham Heart Study.<br><i>J Natl Cancer Inst.</i> 2018;110(11):1201-7.                                 | OS                        | Lung cancer risk                         | Confirmed    | -                                                                           |
| 83 | St John's wort for depression: a systematic review.<br><i>Arch Intern Med.</i> 2000 Jan 24;160(2):152-6.                                                                       | SR of RCTs          | Washington Post (February 15)                                                      | Depression                     | Hypericum                            | Placebo                            | Response                                             | F32 | A systematic review of St. John's wort for major depressive disorder.<br><i>Syst Rev.</i> 2016;5(1):148.                                                                      | SR and MA of RCTs         | Response                                 | Confirmed    | -                                                                           |
| 84 | Systematic review of water fluoridation.<br><i>BMJ.</i> 2000 Oct 7;321(7265):855-9.                                                                                            | SR and MA of OSs    | Daily Mail (October 6)                                                             | Children                       | Fluoridated water                    | Non-fluoridated water              | Decayed, missing, and filled primary/permanent teeth | K02 | Effectiveness of water fluoridation in an upper-middle-income country: A systematic review and meta-analysis.<br><i>Int J Paediatr Dent.</i> 2022;32(4):503-13.               | SR and MA of OSs          | Decayed, missing, and filled teeth index | Confirmed    | -                                                                           |
| 85 | The effect of celecoxib, a cyclooxygenase-2 inhibitor, in familial adenomatous polyposis.<br><i>N Engl J Med.</i> 2000 Jun 29;342(26):1946-52.                                 | RCT                 | Washington Post (June 29)                                                          | Familial adenomatous polyposis | Celecoxib                            | Placebo                            | Number of colorectal polyps                          | D12 | None                                                                                                                                                                          | -                         | -                                        | Unchallenged | -                                                                           |
| 86 | The effectiveness of vaccination against influenza in healthy, working adults.<br><i>N Engl J Med.</i> 1995 Oct 5;333(14):889-93.                                              | RCT                 | Times (October 9)                                                                  | Healthy working adults         | Influenza vaccination                | Placebo                            | Episodes of upper respiratory illness                | J11 | Vaccines for preventing influenza in healthy adults.<br><i>Cochrane Database Syst Rev.</i> 2018;2(2):Cd001269.                                                                | SR and MA of RCTs         | Influenza-like illness                   | Confirmed    | Replicated<br>- Original: SMD=0.20<br>- Subsequent: SMD=0.15 (0.08 to 0.22) |
| 87 | The impact of an antismoking media campaign on progression to established smoking: results of a longitudinal youth study.<br><i>Am J Public Health.</i> 2000 Mar;90(3):380-6.  | OS                  | Washington Post (March 1)<br>Washington Post (March 26)                            | Younger adolescents            | Antismoking media campaign exposure  | No exposure                        | Established smoking                                  | Z72 | Using mass media campaigns to reduce youth tobacco use: a review.<br><i>Am J Health Promot.</i> 2015;30(2):e71-82.                                                            | SR of OSs                 | Narrative description                    | Confirmed    | -                                                                           |
| 88 | The Krukenberg procedure: a surgical option for the treatment of double hand amputees in Sierra Leone.<br><i>Lancet.</i> 2000 Sep 23;356(9235):1072-5.                         | Case series         | New York Times (September 22)                                                      | Double hand amputees           | Krukenberg procedure                 | No comparison                      | Grasping strength                                    | S48 | None                                                                                                                                                                          | -                         | -                                        | Unchallenged | -                                                                           |
| 89 | The volume of primary angioplasty procedures and survival after acute myocardial infarction. National Registry of Myocardial Infarction 2 Investigators.                       | OS                  | New York Times (June 20)                                                           | Acute myocardial infarction    | Higher volume of primary angioplasty | Lower volume                       | Mortality                                            | I21 | The relation between volume and outcome of coronary interventions: a systematic review and meta-analysis.<br><i>Eur Heart J.</i> 2010;31(16):1985-92.                         | SR and MA of OSs          | In-hospital mortality                    | Confirmed    | Replicated<br>- Original: SMD=0.08<br>- Subsequent: SMD=0.08 (0.06 to 0.10) |

|                                                   |                                                                                                             |     |                                                                                      |                                                        |                            |                               |                                                          |     |                                                                                                                                            |                   |                                                                                  |              |                                                                             |
|---------------------------------------------------|-------------------------------------------------------------------------------------------------------------|-----|--------------------------------------------------------------------------------------|--------------------------------------------------------|----------------------------|-------------------------------|----------------------------------------------------------|-----|--------------------------------------------------------------------------------------------------------------------------------------------|-------------------|----------------------------------------------------------------------------------|--------------|-----------------------------------------------------------------------------|
| <i>N Engl J Med. 2000 May 25;342(21):1573-80.</i> |                                                                                                             |     |                                                                                      |                                                        |                            |                               |                                                          |     |                                                                                                                                            |                   |                                                                                  |              |                                                                             |
| 90                                                | Transdermal testosterone treatment in women with impaired sexual function after oophorectomy.               | RCT | New York Times (September 7)<br>Washington Post (September 7)<br>Times (November 16) | Women with impaired sexual function after oophorectomy | Testosterone               | Placebo                       | Composite score of Brief Index of Sexual Functioning     | F52 | Safety and efficacy of testosterone for women: a systematic review and meta-analysis of randomised controlled trial data.                  | SR and MA of RCTs | Sexual desire                                                                    | Confirmed    | Replicated<br>- Original: SMD=0.25<br>- Subsequent: SMD=0.26 (0.13 to 0.39) |
| <i>N Engl J Med. 2000 Sep 7;343(10):682-8.</i>    |                                                                                                             |     |                                                                                      |                                                        |                            |                               |                                                          |     |                                                                                                                                            |                   |                                                                                  |              |                                                                             |
| 91                                                | Treatment of dysthymia and minor depression in primary care: A randomized controlled trial in older adults. | RCT | Daily News (October 2)                                                               | Minor depression or dysthymia                          | Paroxetine                 | Placebo                       | HSCL-D-20                                                | F34 | Efficacy and tolerability of antidepressants for sub-threshold depression and for mild major depressive disorder.                          | SR and MA of RCTs | Narrative description                                                            | Contradicted | -                                                                           |
| <i>JAMA. 2000 Sep 27;284(12):1519-26.</i>         |                                                                                                             |     |                                                                                      |                                                        |                            |                               |                                                          |     |                                                                                                                                            |                   |                                                                                  |              |                                                                             |
| 92                                                | Treatment of hypertension with ascorbic acid.                                                               | RCT | New York Times (January 4)<br>Daily Mail (January 11)                                | Hypertension                                           | Ascorbic acid              | Placebo                       | Systolic blood pressure                                  | I10 | Effects of vitamin C supplementation on essential hypertension: A systematic review and meta-analysis.                                     | SR and MA of RCTs | Systolic blood pressure                                                          | Confirmed    | -                                                                           |
| <i>Lancet. 1999 Dec 11;354(9195):2048-9.</i>      |                                                                                                             |     |                                                                                      |                                                        |                            |                               |                                                          |     |                                                                                                                                            |                   |                                                                                  |              |                                                                             |
| 93                                                | Treatment of warfarin-associated coagulopathy with oral vitamin K: a randomised controlled trial.           | RCT | Washington Post (November 14)                                                        | Warfarin-associated coagulopathy                       | Vitamin K                  | Placebo                       | International normalised ratio                           | D68 | Vitamin K for reversal of excessive vitamin K antagonist anticoagulation: a systematic review and meta-analysis.                           | SR and MA of RCTs | International normalised ratio                                                   | Contradicted | -                                                                           |
| <i>Lancet. 2000 Nov 4;356(9241):1551-3.</i>       |                                                                                                             |     |                                                                                      |                                                        |                            |                               |                                                          |     |                                                                                                                                            |                   |                                                                                  |              |                                                                             |
| 94                                                | Trends in the incidence of coronary heart disease and changes in diet and lifestyle in women.               | OS  | Washington Post (August 24)                                                          | Women                                                  | Diet and lifestyle change  | Historical controls           | Nonfatal myocardial infarction or fatal coronary disease | Z72 | Lifestyle factors, cardiovascular disease and all-cause mortality in middle-aged and elderly women: a systematic review and meta-analysis. | SR and MA of OSs  | Cardiovascular disease, coronary heart disease, stroke, all-cause mortality etc. | Confirmed    | -                                                                           |
| <i>N Engl J Med. 2000 Aug 24;343(8):530-7.</i>    |                                                                                                             |     |                                                                                      |                                                        |                            |                               |                                                          |     |                                                                                                                                            |                   |                                                                                  |              |                                                                             |
| 95                                                | Triggering of sudden death from cardiac causes by vigorous exertion.                                        | OS  | New York Times (November 9)                                                          | Men                                                    | Habitual vigorous exercise | No habitual vigorous exercise | Sudden death                                             | Z72 | None                                                                                                                                       | -                 | -                                                                                | Unchallenged | -                                                                           |
| <i>N Engl J Med. 2000 Nov 9;343(19):1355-61.</i>  |                                                                                                             |     |                                                                                      |                                                        |                            |                               |                                                          |     |                                                                                                                                            |                   |                                                                                  |              |                                                                             |
| 96                                                | Type of alcohol consumed and mortality from all causes, coronary heart disease, and cancer.                 | OS  | Times (October 12)                                                                   | General population                                     | Wine drinking              | Non-wine drinking             | Cancer risk                                              | Z72 | A meta-analysis of alcohol consumption and the risk of brain tumours.                                                                      | SR and MA of OSs  | Brain cancer risk                                                                | Contradicted | -                                                                           |
| <i>Ann Intern Med. 2000 Sep 19;133(6):411-9.</i>  |                                                                                                             |     |                                                                                      |                                                        |                            |                               |                                                          |     |                                                                                                                                            |                   |                                                                                  |              |                                                                             |

|     |                                                                                                                     |     |                                                             |                        |                                                     |                                                                |                                                         |     |                                                                                                                                                                           |                   |                                 |              |   |
|-----|---------------------------------------------------------------------------------------------------------------------|-----|-------------------------------------------------------------|------------------------|-----------------------------------------------------|----------------------------------------------------------------|---------------------------------------------------------|-----|---------------------------------------------------------------------------------------------------------------------------------------------------------------------------|-------------------|---------------------------------|--------------|---|
|     |                                                                                                                     |     |                                                             |                        |                                                     |                                                                |                                                         |     | Alcohol Consumption by Beverage Type and Risk of Breast Cancer: A Dose-Response Meta-Analysis of Prospective Cohort Studies.                                              | SR and MA of OSs  | Breast cancer risk              | Contradicted | - |
|     |                                                                                                                     |     |                                                             |                        |                                                     |                                                                |                                                         |     | <i>Alcohol Alcohol. 2020;55(3):246-53.</i>                                                                                                                                |                   |                                 |              |   |
|     |                                                                                                                     |     |                                                             |                        |                                                     |                                                                |                                                         |     | Association between Alcohol Consumption and Survival in Colorectal Cancer: A Meta-analysis.                                                                               | SR and MA of OSs  | Colorectal cancer risk          | Confirmed    | - |
|     |                                                                                                                     |     |                                                             |                        |                                                     |                                                                |                                                         |     | <i>Cancer Epidemiol Biomarkers Prev. 2019;28(11):1891-901.</i>                                                                                                            |                   |                                 |              |   |
|     |                                                                                                                     |     |                                                             |                        |                                                     |                                                                |                                                         |     | Alcohol consumption and the risk of endometrial cancer: a meta-analysis.                                                                                                  | SR and MA of OSs  | Endometrial cancer risk         | Contradicted | - |
|     |                                                                                                                     |     |                                                             |                        |                                                     |                                                                |                                                         |     | <i>Asia Pac J Clin Nutr. 2011;20(1):125-33.</i>                                                                                                                           |                   |                                 |              |   |
|     |                                                                                                                     |     |                                                             |                        |                                                     |                                                                |                                                         |     | Alcohol intake, alcoholic beverage type and multiple myeloma risk: a meta-analysis of 26 observational studies.                                                           | SR and MA of OSs  | Multiple myeloma risk           | Confirmed    | - |
|     |                                                                                                                     |     |                                                             |                        |                                                     |                                                                |                                                         |     | <i>Leuk Lymphoma. 2015;56(5):1484-501.</i>                                                                                                                                |                   |                                 |              |   |
|     |                                                                                                                     |     |                                                             |                        |                                                     |                                                                |                                                         |     | A meta-analysis of alcohol drinking and oral and pharyngeal cancers: results from subgroup analyses.                                                                      | SR and MA of OSs  | Oral and Pharyngeal cancer risk | Contradicted | - |
|     |                                                                                                                     |     |                                                             |                        |                                                     |                                                                |                                                         |     | <i>Alcohol Alcohol. 2013;48(1):107-18.</i>                                                                                                                                |                   |                                 |              |   |
|     |                                                                                                                     |     |                                                             |                        |                                                     |                                                                |                                                         |     | Alcohol Consumption and the Risk of Prostate Cancer: A Dose-Response Meta-Analysis.                                                                                       | SR and MA of OSs  | Prostate cancer risk            | Contradicted | - |
|     |                                                                                                                     |     |                                                             |                        |                                                     |                                                                |                                                         |     | <i>Nutrients. 2020;12(8).</i>                                                                                                                                             |                   |                                 |              |   |
| 97  | Use of automated external defibrillators by a U.S. airline.                                                         | OS  | New York Times (October 26)<br>Washington Post (November 9) | Passengers in airline  | Automated external defibrillators                   | No use                                                         | Mortality                                               | I46 | A Systematic Review of Pediatric and Adult In-Flight Medical Emergencies.                                                                                                 | SR of OSs         | Narrative description           | Confirmed    | - |
|     |                                                                                                                     |     |                                                             |                        |                                                     |                                                                |                                                         |     | <i>N Engl J Med. 2000 Oct 26;343(17):1210-6.</i><br><i>Int J Pediatr. 2018;2018:6596490.</i>                                                                              |                   |                                 |              |   |
| 98  | Vaginal misoprostol administered 1, 2, or 3 days after mifepristone for early medical abortion: A randomized trial. | RCT | USA Today (October 18)                                      | Abortion               | Misoprostol administration 1 day after mifepristone | Misoprostol administration from 2 to 3 days after mifepristone | Complete medical abortion without surgical intervention | O04 | Medical termination for pregnancy in early first trimester ( $\leq 63$ days) using combination of mifepristone and misoprostol or misoprostol alone: a systematic review. | SR and MA of RCTs | Successful abortion             | Confirmed    | - |
|     |                                                                                                                     |     |                                                             |                        |                                                     |                                                                |                                                         |     | <i>JAMA. 2000 Oct 18;284(15):1948-53.</i><br><i>BMC Womens Health. 2020;20(1):142.</i>                                                                                    |                   |                                 |              |   |
| 99  | Vitamin E consumption and the risk of coronary disease in women.                                                    | OS  | Daily Mail (November 21)                                    | Women                  | High vitamin E intake                               | Low vitamin E intake                                           | Coronary heart disease                                  | I21 | Effect of antioxidant vitamin supplementation on cardiovascular outcomes: a meta-analysis of randomized controlled trials.                                                | SR and MA of RCTs | Myocardial infarction           | Contradicted | - |
|     |                                                                                                                     |     |                                                             |                        |                                                     |                                                                |                                                         |     | <i>N Engl J Med. 1993 May 20;328(20):1444-9.</i><br><i>PLoS One. 2013;8(2):e56803.</i>                                                                                    |                   |                                 |              |   |
| 100 | Yoga-based intervention for carpal tunnel syndrome: a randomized trial.                                             | RCT | Washington Post (October 17)<br>USA Today (February 23)     | Carpal tunnel syndrome | Yoga                                                | Standard wrist splint                                          | Grip strength                                           | G56 | None                                                                                                                                                                      | -                 | -                               | Unchallenged | - |
|     |                                                                                                                     |     |                                                             |                        |                                                     |                                                                |                                                         |     | <i>JAMA. 1998 Nov 11;280(18):1601-3.</i>                                                                                                                                  |                   |                                 |              |   |

Abbreviations: RCT, randomized controlled trial; OS, observational study; SR, systematic review; MA, meta-analysis \*: The primary outcome of original study did not indicate the effectiveness.
