# Supplementary material for: Twenty-year follow-up of promising clinical studies reported in highly circulated newspapers: a meta-epidemiological study
Source: HighWire-hosted journal article supplement (doi:10.1136/bmjhci-2023-100768), 2023-06-01
Supplement: bmjhci-2023-100768supp004_data_supplement.pdf [file bmjhci-2023-100768supp004_data_supplement.pdf]

eTable 4. Main and subgroup analyses of the proportion of confirmed studies

|                                                    | Total   | Unchallenged | Contradicted | Confirmed | Proportion of confirmed studies, 95%CI (%) |
|----------------------------------------------------|---------|--------------|--------------|-----------|--------------------------------------------|
| <b>Original studies</b>                            | 104(#1) | 18           | 27           | 59        | 68.6 (58.1 to 77.5)                        |
| <b>- Research design</b>                           |         |              |              |           |                                            |
| Laboratory study                                   | 1       | 1            | 0            | 0         | -                                          |
| Case series                                        | 3       | 1            | 0            | 2         | 100 (33.8 to 100)                          |
| Observational study                                | 35      | 4            | 12           | 19        | 61.3 (43.7 to 76.4)                        |
| Trial series of observational studies              | 1       | 0            | 0            | 1         | 100 (20.3 to 100)                          |
| SR and MA of observational studies                 | 1       | 0            | 0            | 1         | 100 (20.3 to 100)                          |
| RCT                                                | 56      | 12           | 13           | 31        | 70.5 (55.6 to 81.9)                        |
| Trial series of RCTs                               | 1       | 0            | 0            | 1         | 100 (20.3 to 100)                          |
| SR of RCTs and observational studies               | 1       | 0            | 0            | 1         | 100 (20.3 to 100)                          |
| SR of RCTs                                         | 1       | 0            | 0            | 1         | 100 (20.3 to 100)                          |
| SR and MA of RCTs                                  | 4       | 0            | 2            | 2         | 50.0 (14.8 to 85.2)                        |
| <b>- ICD-10 categories</b>                         |         |              |              |           |                                            |
| Certain infectious and parasitic disease (A00-B99) | 12      | 2            | 2            | 8         | 80.0 (48.7 to 94.4)                        |

|                                                                                                                     |    |   |   |   |                     |
|---------------------------------------------------------------------------------------------------------------------|----|---|---|---|---------------------|
| Neoplasms (C00-D48)                                                                                                 | 6  | 1 | 3 | 2 | 40.0 (11.6 to 77.2) |
| Diseases of the blood and blood-forming organs<br>and certain disorders involving the immune<br>mechanism (D50-D89) | 1  | 0 | 1 | 0 | 0 (0 to 79.7)       |
| Endocrine, nutritional and metabolic diseases<br>(E00-E90)                                                          | 3  | 1 | 0 | 2 | 100 (33.8 to 100)   |
| Mental and behavioral disorders (F00-F99)                                                                           | 13 | 2 | 4 | 7 | 63.6 (35.1 to 85.0) |
| Diseases of the nervous system (G00-G99)                                                                            | 3  | 2 | 0 | 1 | 100 (20.3 to 100)   |
| Diseases of the circulatory system (I00-I99)                                                                        | 16 | 4 | 3 | 9 | 75.0 (46.5 to 91.2) |
| Diseases of the respiratory system (J00-J99)                                                                        | 8  | 1 | 3 | 4 | 57.1 (24.8 to 84.3) |
| Diseases of the digestive system (K00-K93)                                                                          | 4  | 1 | 1 | 2 | 66.7 (20.5 to 93.9) |
| Diseases of the musculoskeletal system<br>(M00-M99)                                                                 | 5  | 0 | 1 | 4 | 80.0 (37.2 to 96.4) |
| Diseases of the genitourinary system<br>(N00-N99)                                                                   | 2  | 0 | 1 | 1 | 50.0 (9.3 to 90.7)  |
| Pregnancy, childbirth and the puerperium<br>(O00-O99)                                                               | 2  | 0 | 0 | 2 | 100 (33.8 to 100)   |
| Symptoms, signs and abnormal clinical and<br>laboratory findings, not elsewhere classified<br>(R00-R99)             | 2  | 1 | 0 | 1 | 100 (20.3 to 100)   |
| Injury, poisoning and certain other consequences                                                                    | 5  | 1 | 3 | 1 | 25.0 (4.5 to 70.3)  |

|                                                                              |                     |    |    |    |                     |
|------------------------------------------------------------------------------|---------------------|----|----|----|---------------------|
| of external causes (S00-T98)                                                 |                     |    |    |    |                     |
| Factors influencing health status and contact with health services (Z00-Z99) | 22                  | 2  | 5  | 15 | 75.0 (52.9 to 88.9) |
| <b>Newspaper stories</b>                                                     | 162 <sup>(#2)</sup> | 30 | 45 | 87 | 65.9 (57.4 to 73.5) |
| <b>- Quality paper</b>                                                       | 111                 | 23 | 32 | 56 | 63.6 (53.1 to 73.0) |
| New York Times (USA)                                                         | 24                  | 7  | 6  | 11 | 64.7 (41.1 to 82.8) |
| Washington Post (USA)                                                        | 68                  | 12 | 19 | 37 | 66.1 (52.9 to 77.2) |
| Daily Telegraph (UK)                                                         | 3                   | 2  | 0  | 1  | 100 (20.3 to 100)   |
| Times (UK)                                                                   | 16                  | 2  | 7  | 7  | 50.0 (26.6 to 73.4) |
| <b>- Non-quality paper</b>                                                   | 51                  | 7  | 13 | 31 | 70.5 (55.6 to 81.9) |
| USA Today (USA)                                                              | 10                  | 1  | 2  | 7  | 77.8 (44.9 to 93.8) |
| Daily News (USA)                                                             | 10                  | 1  | 6  | 3  | 33.3 (11.9 to 64.8) |
| Daily Mail (UK)                                                              | 21                  | 5  | 4  | 12 | 75.0 (50.3 to 89.9) |
| Daily Mirror (UK)                                                            | 10                  | 0  | 1  | 9  | 90.0 (59.2 to 98.2) |

(#1) 104 comparisons from 96 original studies (including duplicate)

(#2) 162 comparisons from 158 newspaper stories (including duplicate)
